# Supplementary material
Source: PubMed Central journal article supplement (PMC7670889)
Supplement: mmc1.pdf [file mmc1.pdf]

# Incidence of VTE and Bleeding Among Hospitalized Patients With Coronavirus Disease 2019

## A Systematic Review and Meta-analysis

*David Jiménez, MD, PhD; Aldara García-Sánchez, MD; Parth Rali, MD; Alfonso Muriel, MD, PhD; Behnood Bikdeli, MD; Pedro Ruiz-Artacho, MD, PhD; Raphael Le Mao, MD, PhD; Carmen Rodríguez, MD; Beverley J. Hunt, MD; and Manuel Monreal, MD, PhD*

CHEST 2021; 159(3):1182-1196

*Online supplements are not copyedited prior to posting and the author(s) take full responsibility for the accuracy of all data.*

© 2020 AMERICAN COLLEGE OF CHEST PHYSICIANS. Reproduction of this article is prohibited without written permission from the American College of Chest Physicians. See online for more details. DOI: 10.1016/j.chest.2020.11.005

## e-Appendix 1. PROSPERO protocol registration

**PROSPERO**  
International prospective register of systematic reviews

  
National Institute for  
Health Research

  
UNIVERSITY of York  
Centre for Reviews and Dissemination

### Systematic review

#### 1. \* Review title.

Give the working title of the review, for example the one used for obtaining funding. Ideally the title should state succinctly the interventions or exposures being reviewed and the associated health or social problems. Where appropriate, the title should use the PI(E)COS structure to contain information on the Participants, Intervention (or Exposure) and Comparison groups, the Outcomes to be measured and Study designs to be included.

Incidence of venous thromboembolism and bleeding among hospitalized patients with COVID-19: a systematic review and meta-analysis

#### 2. Original language title.

For reviews in languages other than English, this field should be used to enter the title in the language of the review. This will be displayed together with the English language title.

#### 3. \* Anticipated or actual start date.

Give the date when the systematic review commenced, or is expected to commence.

31/07/2020

#### 4. \* Anticipated completion date.

Give the date by which the review is expected to be completed.

31/08/2020

#### 5. \* Stage of review at time of this submission.

Indicate the stage of progress of the review by ticking the relevant Started and Completed boxes. Additional information may be added in the free text box provided.

Please note: Reviews that have progressed beyond the point of completing data extraction at the time of initial registration are not eligible for inclusion in PROSPERO. Should evidence of incorrect status and/or completion date being supplied at the time of submission come to light, the content of the PROSPERO record will be removed leaving only the title and named contact details and a statement that inaccuracies in the stage of the review date had been identified.

This field should be updated when any amendments are made to a published record and on completion and publication of the review. If this field was pre-populated from the initial screening questions then you are not able to edit it until the record is published.

The review has not yet started: No

**PROSPERO**  
International prospective register of systematic reviews

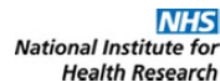

| Review stage                                                    | Started | Completed |
|-----------------------------------------------------------------|---------|-----------|
| Preliminary searches                                            | No      | No        |
| Piloting of the study selection process                         | Yes     | No        |
| Formal screening of search results against eligibility criteria | No      | No        |
| Data extraction                                                 | No      | No        |
| Risk of bias (quality) assessment                               | No      | No        |
| Data analysis                                                   | No      | No        |

Provide any other relevant information about the stage of the review here (e.g. Funded proposal, protocol not yet finalised).

**6. \* Named contact.**

The named contact acts as the guarantor for the accuracy of the information presented in the register record.  
David Jimenez

Email salutation (e.g. "Dr Smith" or "Joanne") for correspondence:

Dr Jimenez

**7. \* Named contact email.**

Give the electronic mail address of the named contact.  
djimenez.hrc@gmail.com

**8. Named contact address**

Give the full postal address for the named contact.  
Colmenar Road  
Km. 9,100  
28034 Madrid (Spain)

**9. Named contact phone number.**

Give the telephone number for the named contact, including international dialling code.  
+34669461858

**10. \* Organisational affiliation of the review.**

Full title of the organisational affiliations for this review and website address if available. This field may be completed as 'None' if the review is not affiliated to any organisation.  
Hospital Ramon y Cajal. Universidad de Alcalá. CIBER Enfermedades Respiratorias.

Organisation web address:

<https://www.comunidad.madrid/hospital/ramonycajal/>

**11. \* Review team members and their organisational affiliations.**

Give the personal details and the organisational affiliations of each member of the review team. Affiliation refers to groups or organisations to which review team members belong. **NOTE: email and country are**

**PROSPERO**  
**International prospective register of systematic reviews**

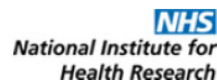

now mandatory fields for each person.

Dr David Jimenez. Hospital Ramon y Cajal  
Dr Parth Rali. Temple University Hospital  
Dr Alfonso Muriel. Hospital Ramon y Cajal  
Dr Raquel Morillo. Hospital Ramon y Cajal  
Dr Behnood Bikdeli. Brigham and Women's Hospital, Harvard Medical School  
Dr Pedro Ruiz-Artacho. Clinica Universidad de Navarra  
Dr Raphael Le Mao. Université Européenne de Bretagne  
Dr Carmen Rodriguez. Hospital Ramon y Cajal  
Dr Beverley Hunt. Guys & St Thomas' NHS Foundation Trust  
Dr Manuel Monreal. Hospital Germans Trias i Pujol

**12. \* Funding sources/sponsors.**

Give details of the individuals, organizations, groups or other legal entities who take responsibility for initiating, managing, sponsoring and/or financing the review. Include any unique identification numbers assigned to the review by the individuals or bodies listed.

None

**Grant number(s)**

**13. \* Conflicts of interest.**

List any conditions that could lead to actual or perceived undue influence on judgements concerning the main topic investigated in the review.

None

**14. Collaborators.**

Give the name and affiliation of any individuals or organisations who are working on the review but who are not listed as review team members. **NOTE: email and country are now mandatory fields for each person.**

**15. \* Review question.**

State the question(s) to be addressed by the review, clearly and precisely. Review questions may be specific or broad. It may be appropriate to break very broad questions down into a series of related more specific questions. Questions may be framed or refined using P(I)E(C)OS where relevant.

What is the overall incidence of venous thromboembolism (VTE) and bleeding among hospitalized patients with COVID-19?

**16. \* Searches.**

State the sources that will be searched. Give the search dates, and any restrictions (e.g. language or publication period). Do NOT enter the full search strategy (it may be provided as a link or attachment.)

Sources: We will search MEDLINE (using the Ovid platform), PubMed, Embase, CINAHL (using the Ovid platform), the Cochrane Library, COVID-19 Open Research Dataset Challenge, COVID-19 Research Database (WHO), Epistemonikos (COVID-19 Living Overview of the Evidence platform), EPPI Centre living systematic map of the evidence, and reference lists of included papers, We will hand search (up to July 31, 2020) preprint servers (bioRxiv, medRxiv, and Social Science Research Network First Look) and coronavirus resource centres of The Lancet, JAMA, and N Engl J Med.

**PROSPERO**  
**International prospective register of systematic reviews**

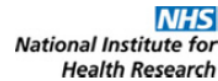

Search dates: From January 1, 2020 to July 31, 2020.

Restrictions: None.

**17. URL to search strategy.**

Give a link to a published pdf/word document detailing either the search strategy or an example of a search strategy for a specific database if available (including the keywords that will be used in the search strategies), or upload your search strategy. Do NOT provide links to your search results.

[https://www.crd.york.ac.uk/PROSPEROFILES/198864\\_STRATEGY\\_20200730.pdf](https://www.crd.york.ac.uk/PROSPEROFILES/198864_STRATEGY_20200730.pdf)

Alternatively, upload your search strategy to CRD in pdf format. Please note that by doing so you are consenting to the file being made publicly accessible.

Do not make this file publicly available until the review is complete

**18. \* Condition or domain being studied.**

Give a short description of the disease, condition or healthcare domain being studied. This could include health and wellbeing outcomes.

COVID-19 may predispose patients to venous thromboembolic events (deep vein thrombosis [DVT] and/or pulmonary embolism [PE]), due to hypoxia, excessive inflammation, platelet activation, endothelial dysfunction, and stasis. Accumulating evidence suggests that hospitalized patients with COVID-19 may have a high incidence of venous thromboembolism (VTE), despite receiving standard thromboprophylaxis according to guidelines for acutely ill medical patients. However, an accurate estimate of the incidence of VTE in hospitalized patients diagnosed with COVID-19 remains unclear, with incidence rates reported between 4.8% and 85%. This variability might have been influenced by the type of events counted, the type of testing for VTE, assessment setting, and the use and type of thromboprophylaxis. Furthermore, the assessment of PE in patients with COVID-19 is conflated by the presence of immunothrombosis. Local inflammation in the lungs with subsequent endothelial inflammation, complement activation, thrombin generation, platelet and leukocyte recruitment, and the initiation of immune responses culminate in small pulmonary vessel thrombosis.

In addition to an increased risk of thrombosis, patients with COVID-19 might be at risk of excess bleeding due to factors such as imbalances in platelet production and destruction, coagulation factor consumption in the setting of severe inflammation, and use of antiplatelet or anticoagulant agents

**19. \* Participants/population.**

Give summary criteria for the participants or populations being studied by the review. The preferred format includes details of both inclusion and exclusion criteria.

**INCLUSION CRITERIA**

VTE and/or major bleeding among hospitalized patients with WHO-defined confirmed or probable COVID-19.

**PROSPERO**  
**International prospective register of systematic reviews**

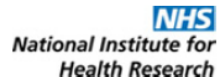

**EXCLUSION CRITERIA**

Studies enrolling 10 consecutive patients initially hospitalized for COVID-19.

**20. \* Intervention(s), exposure(s).**

Give full and clear descriptions or definitions of the nature of the interventions or the exposures to be reviewed.

Patients hospitalized for COVID-19 who are diagnosed of VTE and/or bleeding during hospitalization.

**21. \* Comparator(s)/control.**

Where relevant, give details of the alternatives against which the main subject/topic of the review will be compared (e.g. another intervention or a non-exposed control group). The preferred format includes details of both inclusion and exclusion criteria.

Patients hospitalized for COVID-19 who are not diagnosed of VTE or bleeding during hospitalization.

**22. \* Types of study to be included.**

Give details of the types of study (study designs) eligible for inclusion in the review. If there are no restrictions on the types of study design eligible for inclusion, or certain study types are excluded, this should be stated. The preferred format includes details of both inclusion and exclusion criteria.

Observational studies such as cohort (prospective or retrospective) and cross-sectional studies.

**23. Context.**

Give summary details of the setting and other relevant characteristics which help define the inclusion or exclusion criteria.

**24. \* Main outcome(s).**

Give the pre-specified main (most important) outcomes of the review, including details of how the outcome is defined and measured and when these measurement are made, if these are part of the review inclusion criteria.

The primary outcome will be the incidence of VTE during hospitalization among patients hospitalized for COVID-19, expressed as the proportion of patients with a diagnosis of VTE. VTE includes upper and lower limb deep vein thrombosis (DVT) and pulmonary embolism (PE) diagnosed by accepted imaging tests, either after clinical suspicion or by routine screening. The secondary outcome will be the incidence of major bleeding during hospitalization among patients hospitalized for COVID-19. Definitions of major bleeding will be according to definitions in the individual studies. The outcomes data from the first available time point identified as a primary endpoint from each study will be incorporated into our primary analysis.

**\* Measures of effect**

Please specify the effect measure(s) for you main outcome(s) e.g. relative risks, odds ratios, risk difference, and/or 'number needed to treat.

Proportion of patients.

**25. \* Additional outcome(s).**

List the pre-specified additional outcomes of the review, with a similar level of detail to that required for main

**PROSPERO**  
International prospective register of systematic reviews

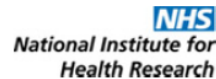

outcomes. Where there are no additional outcomes please state 'None' or 'Not applicable' as appropriate to the review

None.

**\* Measures of effect**

Please specify the effect measure(s) for you additional outcome(s) e.g. relative risks, odds ratios, risk difference, and/or 'number needed to treat.

Not applicable.

**26. \* Data extraction (selection and coding).**

Describe how studies will be selected for inclusion. State what data will be extracted or obtained. State how this will be done and recorded.

Two authors will screen titles and abstracts, review full texts, extract data, and assess risk of bias independently, using standardized prepiloted forms. We will resolve disagreements by consensus. We will extract data for study design, setting, population characteristics, quantitative outcomes, study limitations, and other important comments. Two independent researchers (DJ and RLM) will perform the screening and data extraction with disagreements resolved by discussion within the wider team (PR, BB and MM).

**27. \* Risk of bias (quality) assessment.**

Describe the method of assessing risk of bias or quality assessment. State which characteristics of the studies will be assessed and any formal risk of bias tools that will be used.

We will use the Newcastle-Ottawa scale to rate risk of bias for comparative non-randomised studies corresponding to every study's design (cohort or cross-sectional). This assesses the representativeness of the sample, sample size, response rate, ascertainment of the exposure, control of confounding variables, assessment of preventability, and appropriate statistical analysis, which provides a score ranging from 0 (lowest grade) to 9 (highest grade). A higher grade indicates a lower risk of bias. The Begg rank correlation method will assess for publication bias.

**28. \* Strategy for data synthesis.**

Provide details of the planned synthesis including a rationale for the methods selected. This **must not be generic text** but should be **specific to your review** and describe how the proposed analysis will be applied to your data.

We will analyze pooled data on the incidence of VTE and major bleeding using a random-effects model approach. We will measure statistical heterogeneity between groups using the Cochran's Q statistic and the Higgins I<sup>2</sup> statistic. Conventionally, I<sup>2</sup> values of 25%, 50%, and 75% indicate low, moderate, and high heterogeneity, respectively.

**29. \* Analysis of subgroups or subsets.**

State any planned investigation of 'subgroups'. Be clear and specific about which type of study or participant will be included in each group or covariate investigated. State the planned analytic approach.

We will analyze data for subgroup effects by VTE type (i.e. DVT vs. PE), as well as setting (ward vs.

**PROSPERO**  
International prospective register of systematic reviews

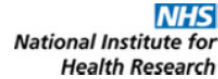

intensive care unit [ICU]), type of assessment for VTE (i.e. screening vs. clinical diagnosis), intensity of pharmacological thromboprophylaxis (no pharmacological thromboprophylaxis vs. standard-dose thromboprophylaxis vs. intermediate-dose thromboprophylaxis vs. therapeutic anticoagulation), and geographical area (North America vs. Europe vs. Rest of the World). A priori, another planned exploratory analysis will involve the incidence of outcomes in studies with a prospective design. The clinical significance of immunothrombosis in patients with COVID-19 is not yet clear. We, therefore, will also analyze the incidence of PE after excluding episodes of subsegmental PE.

30. \* Type and method of review.

Select the type of review and the review method from the lists below. Select the health area(s) of interest for your review.

Type of review

Cost effectiveness

No

Diagnostic

No

Epidemiologic

Yes

Individual patient data (IPD) meta-analysis

No

Intervention

No

Meta-analysis

Yes

Methodology

No

Narrative synthesis

No

Network meta-analysis

No

Pre-clinical

No

Prevention

No

Prognostic

No

Prospective meta-analysis (PMA)

No

Review of reviews

No

Service delivery

No

Synthesis of qualitative studies

No

Systematic review

Yes

Other



No

Health area of the review

Alcohol/substance misuse/abuse

No

Blood and immune system

No

Cancer

No

Cardiovascular

Yes

Care of the elderly

No

Child health

No

Complementary therapies

No

COVID-19

Yes

Crime and justice

No

Dental

No

Digestive system

No

Ear, nose and throat

No

Education

No

Endocrine and metabolic disorders

No

Eye disorders

No

General interest

No

Genetics

No

Health inequalities/health equity

No

Infections and infestations

No

International development

No

Mental health and behavioural conditions

No

Musculoskeletal

No

Neurological

No

Nursing

**PROSPERO**  
International prospective register of systematic reviews

No  
Obstetrics and gynaecology  
No  
Oral health  
No  
Palliative care  
No  
Perioperative care  
No  
Physiotherapy  
No  
Pregnancy and childbirth  
No  
Public health (including social determinants of health)  
No  
Rehabilitation  
No  
Respiratory disorders  
No  
Service delivery  
No  
Skin disorders  
No  
Social care  
No  
Surgery  
No  
Tropical Medicine  
No  
Urological  
No  
Wounds, injuries and accidents  
No  
Violence and abuse  
No

**31. Language.**

Select each language individually to add it to the list below, use the bin icon to remove any added in error.  
English

There is not an English language summary

**32. \* Country.**

Select the country in which the review is being carried out from the drop down list. For multi-national collaborations select all the countries involved.

Spain

**33. Other registration details.**

Give the name of any organisation where the systematic review title or protocol is registered (such as with

**PROSPERO**  
**International prospective register of systematic reviews**

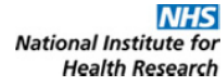

The Campbell Collaboration, or The Joanna Briggs Institute) together with any unique identification number assigned. (N.B. Registration details for Cochrane protocols will be automatically entered). If extracted data will be stored and made available through a repository such as the Systematic Review Data Repository (SRDR), details and a link should be included here. If none, leave blank.

**34. Reference and/or URL for published protocol.**

Give the citation and link for the published protocol, if there is one

Give the link to the published protocol.

Alternatively, upload your published protocol to CRD in pdf format. Please note that by doing so you are consenting to the file being made publicly accessible.

**No I do not make this file publicly available until the review is complete**

Please note that the information required in the PROSPERO registration form must be completed in full even if access to a protocol is given.

**35. Dissemination plans.**

Give brief details of plans for communicating essential messages from the review to the appropriate audiences.

**Do you intend to publish the review on completion?**

Yes

**36. Keywords.**

Give words or phrases that best describe the review. Separate keywords with a semicolon or new line. Keywords will help users find the review in the Register (the words do not appear in the public record but are included in searches). Be as specific and precise as possible. Avoid acronyms and abbreviations unless these are in wide use.

COVID-19; coronavirus; venous thromboembolism; bleeding.

**37. Details of any existing review of the same topic by the same authors.**

Give details of earlier versions of the systematic review if an update of an existing review is being registered, including full bibliographic reference if possible.

**38. \* Current review status.**

Review status should be updated when the review is completed and when it is published. For new registrations the review must be Ongoing.

Please provide anticipated publication date

Review\_Ongoing

**39. Any additional information.**

Provide any other information the review team feel is relevant to the registration of the review.

Comprehensive assessment of the thrombotic and hemorrhagic event rates is critical in thorough

assessment of the disease course for COVID-19 and for considering strategies to mitigate patient outcomes.

**40. Details of final report/publication(s) or preprints if available.**

This field should be left empty until details of the completed review are available OR you have a link to a preprint.

# CHEST™ Online Supplement

**PROSPERO**  
International prospective register of systematic reviews

  
National Institute for  
Health Research

Give the link to the published review.

**e-Table 1. MOOSE checklist for meta-analyses of observational studies (50)**

| Item No                                     | Recommendation                                                                                                                                                                                                                                                               | Reported on Page No     |
|---------------------------------------------|------------------------------------------------------------------------------------------------------------------------------------------------------------------------------------------------------------------------------------------------------------------------------|-------------------------|
| Reporting of background should include      |                                                                                                                                                                                                                                                                              |                         |
| 1                                           | Problem definition                                                                                                                                                                                                                                                           | 6, 7                    |
| 2                                           | Hypothesis statement                                                                                                                                                                                                                                                         | -                       |
| 3                                           | Description of study outcome(s)                                                                                                                                                                                                                                              | 6, 7                    |
| 4                                           | Type of exposure or intervention used                                                                                                                                                                                                                                        | 6, 7                    |
| 5                                           | Type of study designs used                                                                                                                                                                                                                                                   | 6, 7                    |
| 6                                           | Study population                                                                                                                                                                                                                                                             | 6, 7                    |
| Reporting of search strategy should include |                                                                                                                                                                                                                                                                              |                         |
| 7                                           | Qualifications of searchers (eg, librarians and investigators)                                                                                                                                                                                                               | 7                       |
| 8                                           | Search strategy, including time period included in the synthesis and key words                                                                                                                                                                                               | 7                       |
| 9                                           | Effort to include all available studies, including contact with authors                                                                                                                                                                                                      | 7                       |
| 10                                          | Databases and registries searched                                                                                                                                                                                                                                            | 7                       |
| 11                                          | Search software used, name and version, including special features used (eg, explosion)                                                                                                                                                                                      | -                       |
| 12                                          | Use of hand searching (eg, reference lists of obtained articles)                                                                                                                                                                                                             | 7                       |
| 13                                          | List of citations located and those excluded, including justification                                                                                                                                                                                                        | 9<br>Fig 1              |
| 14                                          | Method of addressing articles published in languages other than English                                                                                                                                                                                                      | -                       |
| 15                                          | Method of handling abstracts and unpublished studies                                                                                                                                                                                                                         | 7                       |
| 16                                          | Description of any contact with authors                                                                                                                                                                                                                                      | 7                       |
| Reporting of methods should include         |                                                                                                                                                                                                                                                                              |                         |
| 17                                          | Description of relevance or appropriateness of studies assembled for assessing the hypothesis to be tested                                                                                                                                                                   | 7, 8                    |
| 18                                          | Rationale for the selection and coding of data (eg, sound clinical principles or convenience)                                                                                                                                                                                | 7, 8                    |
| 19                                          | Documentation of how data were classified and coded (eg, multiple raters, blinding and interrater reliability)                                                                                                                                                               | 7, 8                    |
| 20                                          | Assessment of confounding (eg, comparability of cases and controls in studies where appropriate)                                                                                                                                                                             | -                       |
| 21                                          | Assessment of study quality, including blinding of quality assessors, stratification or regression on possible predictors of study results                                                                                                                                   | 8                       |
| 22                                          | Assessment of heterogeneity                                                                                                                                                                                                                                                  | 8                       |
| 23                                          | Description of statistical methods (eg, complete description of fixed or random effects models, justification of whether the chosen models account for predictors of study results, dose-response models, or cumulative meta-analysis) in sufficient detail to be replicated | 8, 9                    |
| 24                                          | Provision of appropriate tables and graphics                                                                                                                                                                                                                                 | Tables 1-2,<br>Figs 1-3 |

| Reporting of results should include |                                                                     |                                 |
|-------------------------------------|---------------------------------------------------------------------|---------------------------------|
| 25                                  | Graphic summarizing individual study estimates and overall estimate | Figs 2, 3<br>Appendixes<br>7, 9 |
| 26                                  | Table giving descriptive information for each study included        | Table 2<br>Appendix 4           |
| 27                                  | Results of sensitivity testing (eg, subgroup analysis)              | 11-13<br>Appendixes<br>7-9      |
| 28                                  | Indication of statistical uncertainty of findings                   | 10-13                           |

## e-Appendix 2. Search strategies

### MEDLINE

(2019-nCoV OR 2019nCoV OR COVID-19 OR SARS-CoV-2 OR (wuhan AND coronavirus) OR (2019 AND novel AND coronavirus)) AND (2019/12[PDAT]:2030[PDAT]) AND ((venous thromboembolism OR thromboembolism OR venous embolism OR embolism OR pulmonary embolism OR thrombosis OR thrombo\* OR venous thrombo\* OR vein thrombo\*) OR (bleeding OR bleed\* OR hemorrhage))

**La búsqueda arrojó:**  
3688 resultados de texto

**Ordenar por:**

SCORE

[Personalizar la visualización](#)

### Pubmed

(2019-nCoV OR 2019nCoV OR COVID-19 OR SARS-CoV-2 OR (wuhan AND coronavirus) OR (2019 AND novel AND coronavirus)) AND (2019/12[PDAT]:2030[PDAT]) AND ((venous thromboembolism OR thromboembolism OR venous embolism OR embolism OR pulmonary embolism OR thrombosis OR thrombo\* OR venous thrombo\* OR vein thrombo\*) OR (bleeding OR bleed\* OR hemorrhage))

| History and Search Details |         |         |                                                                                                                                                                                                                                     |           |          | ↓ Download | 🗑 Delete |
|----------------------------|---------|---------|-------------------------------------------------------------------------------------------------------------------------------------------------------------------------------------------------------------------------------------|-----------|----------|------------|----------|
| Search                     | Actions | Details | Query                                                                                                                                                                                                                               | Results   | Time     |            |          |
| #6                         | ...     | >       | Search: #1 OR #2 OR #3 AND #4 AND #5 Sort by: Most Recent                                                                                                                                                                           | 3,691     | 00:50:14 |            |          |
| #5                         | ...     | >       | Search: ((venous thromboembolism OR thromboembolism OR venous embolism OR embolism OR pulmonary embolism OR thrombosis OR thrombo* OR venous thrombo* OR vein thrombo*) OR (bleeding OR bleed* OR hemorrhage)) Sort by: Most Recent | 5,265,486 | 00:49:02 |            |          |
| #4                         | ...     | >       | Search: 2019/12[PDAT]:2030[PDAT] Sort by: Most Recent                                                                                                                                                                               | 1,059,872 | 00:48:19 |            |          |
| #3                         | ...     | >       | Search: ((2019) AND (novel)) AND (coronavirus) Sort by: Most Recent                                                                                                                                                                 | 3,043     | 00:47:38 |            |          |
| #2                         | ...     | >       | Search: (wuhan) AND (coronavirus) Sort by: Most Recent                                                                                                                                                                              | 2,951     | 00:46:54 |            |          |
| #1                         | ...     | >       | Search: (((2019-nCoV) OR (2019-nCoV)) OR (COVID-19)) OR (SARS-CoV-2) Sort by: Most Recent                                                                                                                                           | 36,312    | 00:46:19 |            |          |

## EMBASE

(2019-nCoV OR 2019nCoV OR COVID-19 OR SARS-CoV-2 OR (wuhan AND coronavirus) OR (2019 AND novel AND coronavirus)) AND ((venous thromboembolism OR thromboembolism OR venous embolism OR embolism OR pulmonary embolism OR thrombosis OR thrombo\* OR venous thrombo\* OR vein thrombo\*) OR (bleeding OR bleed\* OR hemorrhage))

History   Save | Delete | Print view | Export | Email   Combine >   using  And  Or   [Collapse](#)

#1   ('2019 nCoV'/exp OR '2019 nCoV' OR 2019nCoV OR 'covid 19'/exp OR 'covid 19' OR 'sars cov 2'/exp OR 'sars cov 2' OR (wuhan AND ('coronavirus'/exp OR coronavirus)) OR (2019 AND novel AND ('coronavirus'/exp OR coronavirus))) AND (((('venous thromboembolism'/exp OR 'venous thromboembolism' OR (venous AND ('thromboembolism'/exp OR thromboembolism)) OR 'thromboembolism'/exp OR thromboembolism OR 'venous embolism'/exp OR 'venous embolism' OR (venous AND ('embolism'/exp OR embolism)) OR 'embolism'/exp OR embolism OR 'pulmonary embolism'/exp OR 'pulmonary embolism' OR (pulmonary AND ('embolism'/exp OR embolism)) OR 'thrombosis'/exp OR thrombosis OR thrombo\* OR venous) AND thrombo\* OR 'vein'/exp OR vein) AND thrombo\* OR 'bleeding'/exp OR bleeding OR bleed\* OR 'hemorrhage'/exp OR hemorrhage)   1,981

1,981 results for search #1   [Set email alert](#)   [Set RSS feed](#)   [Search details](#)   [Index miner](#)

## CINAHL

(2019-nCoV OR 2019nCoV OR COVID-19 OR SARS-CoV-2 OR (wuhan AND coronavirus) OR (2019 AND novel AND coronavirus)) AND ((venous thromboembolism OR thromboembolism OR venous embolism OR embolism OR pulmonary embolism OR thrombosis OR thrombo\* OR venous thrombo\* OR vein thrombo\*) OR (bleeding OR bleed\* OR hemorrhage))

 Buscando: CINAHL with Full Text | [Bases de datos](#)    Sugerir términos temáticos   

     [?](#)

[Búsqueda básica](#)   [Búsqueda avanzada](#)   [Historial de búsqueda](#)

  Resultados de la búsqueda: 1 a 50 de 179   Fecha más reciente ▾   Opciones de página ▾    ▾



## Cochrane Library

(2019-nCoV OR 2019nCoV OR COVID-19 OR SARS-CoV-2 OR (wuhan AND coronavirus) OR (2019 AND novel AND coronavirus)) AND (2019/12[PDAT]:2030[PDAT]) AND ((venous thromboembolism OR thromboembolism OR venous embolism OR embolism OR pulmonary embolism OR thrombosis OR thrombo\* OR venous thrombo\* OR vein thrombo\*) OR (bleeding OR bleed\* OR hemorrhage))

Cochrane Reviews

0

Cochrane Protocols

0

Trials

0

Editorials

0

Special Collections

0

Clinical Answers

0

Other Reviews

0 Cochrane Reviews matching **(2019-nCoV OR 2019nCoV OR COVID-19 OR SARS-CoV-2 OR (wuhan AND coronavirus) OR (2019 AND novel AND coronavirus)) AND (2019/12[PDAT]:2030[PDAT]) AND ((venous thromboembolism OR thromboembolism OR venous embolism OR embolism OR pulmonary embolism OR thrombosis OR thrombo\* OR venous thrombo\* OR vein thrombo\*) OR (bleeding OR bleed\* OR hemorrhage)) in Title Abstract Keyword**

Did you mean: [bovid](#) | [sarA](#) | [sari](#)

[Cochrane Database of Systematic Reviews](#)

Issue 7 of 12, July 2020

## COVID-19 Open Research Dataset Challenge

(2019-nCoV OR 2019nCoV OR COVID-19 OR SARS-CoV-2 OR (wuhan AND coronavirus) OR (2019 AND novel AND coronavirus)) AND (2019/12[PDAT]:2030[PDAT]) AND ((venous thromboembolism OR thromboembolism OR venous embolism OR embolism OR pulmonary embolism OR thrombosis OR thrombo\* OR venous thrombo\* OR vein thrombo\*) OR (bleeding OR bleed\* OR hemorrhage))

Searching for (2019-nCoV OR 2019nCoV OR COVID-19 OR SARS-CoV-2 OR (wuhan AND coronavirus) OR (2019 AND novel AND coronavirus)) AND (2019/12[PDAT]:2030[PDAT]) AND ((venous thromboembolism OR thromboembolism OR venous embolism OR embolism OR pulmonary embolism OR thrombosis OR thrombo\* OR venous thrombo\* OR vein thrombo\*) OR (bleeding OR bleed\* OR hemorrhage)) within

We came up empty searching for "(2019-nCoV OR 2019nCoV OR COVID-19 OR SARS-CoV-2 OR (wuhan AND coronavirus) OR (2019 AND novel AND coronavirus)) AND (2019/12[PDAT]:2030[PDAT]) AND ((venous thromboembolism OR thromboembolism OR venous embolism OR embolism OR pulmonary embolism OR thrombosis OR thrombo\* OR venous thrombo\* OR vein thrombo\*) OR (bleeding OR bleed\* OR hemorrhage))".

## COVID-19 Research Database (WHO)

(2019-nCoV OR 2019nCoV OR COVID-19 OR SARS-CoV-2 OR (wuhan AND coronavirus) OR (2019 AND novel AND coronavirus)) AND (2019/12[PDAT]:2030[PDAT]) AND ((venous thromboembolism OR thromboembolism OR venous embolism OR embolism OR pulmonary embolism OR thrombosis OR thrombo\* OR venous thrombo\* OR vein thrombo\*) OR (bleeding OR bleed\* OR hemorrhage))

The screenshot shows the WHO COVID-19 search interface. It features the WHO logo and the text "World Health Organization" on the left. The main header is "COVID-19 Global literature on coronavirus disease" with language options: العربية, 中文 (中国), english, français, Русский, español, português. There is an "Advanced Search" button with a question mark. Below the header is a search bar with a dropdown menu set to "Title, abstract, subject" and a search query: "(2019-nCoV OR 2019nCoV OR COVID-19 OR SARS-CoV-2 OR (wuhan AN". A search icon is on the right. At the bottom, there is a navigation bar with "Home / Search / (2019-nCoV OR 2019nCoV OR COVID-19 OR SARS-CoV-2 OR (wuhan AND coronavirus) OR (2019 AND n... (204)", an "Order by" dropdown, "Show: 20 | 50 | 100", and "Results 1 - 20 de 204".

## Epistemonikos (COVID-19 Living Overview of the Evidence platform)

(2019-nCoV OR 2019nCoV OR COVID-19 OR SARS-CoV-2 OR (wuhan AND coronavirus) OR (2019 AND novel AND coronavirus)) AND ((venous thromboembolism OR thromboembolism OR venous embolism OR embolism OR pulmonary embolism OR thrombosis OR thrombo\* OR venous thrombo\* OR vein thrombo\*) OR (bleeding OR bleed\* OR hemorrhage))

The screenshot shows the Epistemonikos COVID-19 Evidence platform search interface. It has a navigation bar with "Epistemonikos" and "About", "Help", "Contact" links. There are "COVID-19 Evidence" and "COVID-19 News" tabs. The main header is "Advanced search" with a search bar containing the query: "(2019-nCoV OR 2019nCoV OR COVID-19 OR SARS-CoV-2 OR (wuhan AND coronavirus) OR (2019 AND novel AND coronavirus)) AND ((venous thromboembolism OR thromboembolism OR venous embolism OR embolism OR pulmonary embolism OR thrombosis OR thrombo\* OR venous thrombo\* OR vein thrombo\*) OR (bleeding OR bleed\* OR hemorrhage))". There is a "Show search editor" link. At the bottom, there is a "Filters" section with "Showing items 1 - 10 Total: 85" and an "Export results" link.

## bioRxiv

COVID-19 AND (venous thrombo OR pulmonary embolism OR bleed OR hemorrhage)

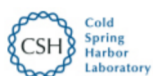

**bioRxiv**  
THE PREPRINT SERVER FOR BIOLOGY

HOME | ABOUT | SUBMIT | NEWS & NOTES | ALERTS / RSS | CHANNELS

Search    
Advanced Search

**290 Results** for term "covid-19 AND (venous thrombo OR pulmonary embolism OR bleed OR hemorrhage)"

**e-Table 2. Detailed characteristics of included studies**

| Study                | Continent     | n                                  | Age, y                                      | Cancer, % | History of VTE, % | Follow-up, d | VTE, n (%) | Incidence of DVT, % (% of IDDDVT/CAT) | Incidence of PE, % (% of ISSPE) | Bleeding, n (%) | Major bleeding, n (%) |
|----------------------|---------------|------------------------------------|---------------------------------------------|-----------|-------------------|--------------|------------|---------------------------------------|---------------------------------|-----------------|-----------------------|
| Al-Samkari et al (1) | North America | 400<br>Male: 228<br>Female: 172    | Ward:<br>60 (23-99)<br>ICU: 65 (32-97)      | -         | -                 | 6-9          | 19 (4.8)   | 2.3 (22.2)                            | 2.5 (10.0)                      | 19 (4.8)        | 9 (2.3)               |
| Artifoni et al (2)   | Europe        | 71<br>Male: 43<br>Female: 28       | 64 (46-75)                                  | 6         | 7                 | 13           | 16 (22.5)  | 12.7 (77.8)                           | 9.9                             | -               | -                     |
| Beun et al (3)       | Europe        | 75<br>Male: -<br>Female: -         | 61 (53-68)                                  | -         | -                 | -            | 23 (30.7)  | 4.0                                   | 26.7 (80.0)                     | -               | -                     |
| Bilaloglu et al (4)  | North America | 3334<br>Male: 2014<br>Female: 1320 | 64 (51-75)                                  | -         | -                 | -            | 235 (7.0)  | 3.9                                   | 3.2                             | -               | -                     |
| Cattaneo et al (5)   | Europe        | 388<br>Male: -<br>Female: -        | 70 (58-78)                                  | 10.0      | 0                 | -            | 0 (0)      | 0                                     | -                               | -               | -                     |
| Chen J et al (6)     | Asia          | 1008<br>Male: -<br>Female: -       | -                                           | -         | -                 | -            | 10 (1.0)   | -                                     | 1.0                             | -               | -                     |
| Chen S et al (7)     | Asia          | 88<br>Male: 54<br>Female: 34       | 63 (55-71)                                  | 6         | -                 | >7           | 40 (45.5)  | 45.5 (80.0)                           | -                               | -               | -                     |
| Criel et al (8)      | Europe        | 82<br>Male: 48<br>Female: 34       | Ward:<br>63.6 ± 14.4<br>ICU:<br>64.5 ± 11.8 | -         | -                 | -            | 6 (7.3)    | 7.3                                   | -                               | -               | -                     |
| Cui et al (9)        | Asia          | 81<br>Male: 37<br>Female: 44       | 59.9 ± 14.1                                 | -         | -                 | -            | 20 (24.7)  | 24.7                                  | 0                               | -               | -                     |



|                             |               |                                |               |      |     |      |              |                |                |         |         |
|-----------------------------|---------------|--------------------------------|---------------|------|-----|------|--------------|----------------|----------------|---------|---------|
| Demelo-Rodriguez et al (10) | Europe        | 156<br>Male: 102<br>Female: 54 | 68.1 ± 14.5   | 10.3 | 1.3 | 9    | 23<br>(14.7) | 14.7<br>(95.7) | -              | -       | -       |
| Desborough et al (11)       | Europe        | 66<br>Male: 48<br>Female: 18   | 59<br>(49-66) | 7.6  | -   | 9    | 11<br>(16.7) | 9.1<br>(100)   | 7.6<br>(20.0)  | -       | -       |
| Dubois-Silva et al (12)     | Europe        | 171<br>Male: -<br>Female: -    | -             | -    | -   | -    | 8<br>(4.7)   | -              | 4.7<br>(37.5)  | -       | -       |
| Fauvel et al (13)           | Europe        | 2878<br>Male: -<br>Female: -   | -             | -    | -   | -    | 103<br>(3.6) | -              | 3.6            | -       | -       |
| Fraisse et al (14)          | Europe        | 92<br>Male: 73<br>Female: 19   | 61<br>(55-70) | -    | 5   | 9    | 31<br>(33.7) | 6.5            | 27.2           | -       | -       |
| Grandmaison et al (15)      | Europe        | 58<br>Male: -<br>Female: -     | -             | -    | -   | -    | 23<br>(39.7) | 32.8<br>(21.1) | 6.9            | -       | -       |
| Grillet et al (16)          | Europe        | 280<br>Male: -<br>Female: -    | -             | -    | -   | -    | 23<br>(8.2)  | -              | 8.2            | -       | -       |
| Hekimian et al (17)         | Europe        | 51<br>Male: -<br>Female: -     | -             | -    | -   | -    | 8<br>(15.7)  | -              | 15.7           | -       | -       |
| Helms et al (18)            | Europe        | 150<br>Male: 122<br>Female: 28 | 63<br>(53-71) | 6.0  | 5.3 | 7-30 | 28<br>(18.7) | 2.0            | 16.7<br>(12.0) | 4 (2.7) | 4 (2.7) |
| Hippensteel et al (19)      | United States | 91<br>Male: 53<br>Female: 38   | -             | 3.3  | -   | -    | 24<br>(26.4) | 20.9<br>(42.1) | 5.5            | -       | -       |
| Klok et al (20)             | Europe        | 184<br>Male: 140<br>Female: 44 | 64 ± 12       | 2.7  | -   | 7    | 28<br>(15.2) | 1.6<br>(66.7)  | 13.6<br>(28.0) | -       | -       |
| Klok et al (21)             | Europe        | 184<br>Male: 140<br>Female: 44 | 64 ± 12       | 2.7  | -   | 14   | 68<br>(37.0) | 1.6            | 35.3           | -       | -       |



|                         |               |                                 |                  |      |     |       |              |                |                |   |   |
|-------------------------|---------------|---------------------------------|------------------|------|-----|-------|--------------|----------------|----------------|---|---|
| Koleilat et al (22)     | United States | 3404<br>Male: -<br>Female: -    | -                | -    | -   | -     | 18<br>(0.5)  | 0.5            | -              | - | - |
| Llitjos et al (23)      | Europe        | 26<br>Male: 20<br>Female: 6     | 68<br>(52-75)    | 0    | 4   | -     | 18<br>(69.2) | 69.2           | -              | - | - |
| Lodigiani et al (24)    | Europe        | 388<br>Male: 264<br>Female: 124 | 66<br>(55-75)    | 6.4  | 3.1 | 18    | 16<br>(4.1)  | 1.5<br>(16.7)  | 2.6<br>(10.0)  | - | - |
| Longchamp et al (25)    | Europe        | 25<br>Male: 16<br>Female: 9     | 68 ± 11          | 8    | 0   | 5-10  | 14<br>(56.0) | 24.0           | 32.0           | - | - |
| Maatman et al (26)      | North America | 109<br>Male: 62<br>Female: 47   | 61 ± 16          | -    | -   | 36-55 | 29<br>(26.6) | 23.9<br>(3.8)  | 2.8            | - | - |
| Mazzaccaro et al (27)   | Europe        | 32<br>Male: 23<br>Female: 9     | 68.6 ± 12        | -    | -   | -     | 21<br>(65.6) | 0              | 65.6<br>(34.5) | - | - |
| Mei et al (28)          | Asia          | 256<br>Male: 131<br>Female: 125 | 55.5<br>(0.5-87) | 1.6  | 0   | 28    | 5<br>(2.0)   | 1.6            | 0.4            | - | - |
| Mestre-Gomez et al (29) | Europe        | 452<br>Male: -<br>Female: -     | -                | -    | -   | -     | 29<br>(6.4)  | -              | 6.4<br>(69.0)  | - | - |
| Middeldorp et al (30)   | Europe        | 198<br>Male: 130<br>Female: 68  | 61 ± 14          | 3.5  | 5.6 | 7     | 39<br>(19.7) | 13.1<br>(42.3) | 6.6<br>(15.4)  | - | - |
| Minuz et al (31)        | Europe        | 10<br>Male: -<br>Female: -      | -                | -    | -   | 7     | 6<br>(60.0)  | -              | 60.0           | - | - |
| Moll et al (32)         | North America | 210<br>Male: 101<br>Female: 109 | 62.2 ± 16.2      | 24.2 | 4.3 | 7     | 9<br>(4.3)   | 3.3            | 1.0            | - | - |



|                         |               |                                 |             |      |      |       |           |             |            |           |           |
|-------------------------|---------------|---------------------------------|-------------|------|------|-------|-----------|-------------|------------|-----------|-----------|
| Nahum et al (33)        | Europe        | 34<br>Male: 25<br>Female: 9     | 62.2 ± 8.6  | 3    | -    | 2     | 22 (64.7) | 64.7 (63.6) | -          | -         | -         |
| Patell et al (34)       | North America | 399<br>Male: 210<br>Female: 189 | -           | -    | -    | 9     | 22 (5.5)  | 3.8 (40.0)  | 1.8        | 86 (21.6) | 45 (11.3) |
| Pesavento et al (35)    | Europe        | 324<br>Male: 181<br>Female: 143 | 71 (59-82)  | -    | -    | 12-17 | -         | -           | -          | 33 (10.2) | 16 (4.9)  |
| Poissy et al (36)       | Europe        | 107<br>Male: -<br>Female: -     | -           | -    | -    | 6     | 22 (20.6) | -           | 20.6       | -         | -         |
| Ren et al (37)          | Asia          | 48<br>Male: 26<br>Female: 22    | 70 (62-80)  | -    | -    | -     | 41 (85.4) | 85.4 (90.2) | -          | -         | -         |
| Rieder et al (38)       | Europe        | 49<br>Male: 30<br>Female: 19    | 60 ± 23     | 22.4 | 12.2 | 10    | 2 (4.1)   | -           | 4.1        | -         | -         |
| Santoliquido et al (39) | Europe        | 84<br>Male: 61<br>Female: 23    | 67.6 ± 13.5 | 16.7 | 3.6  | 24    | 10 (11.9) | 11.9 (80.0) | -          | -         | -         |
| Stoneham et al (40)     | Europe        | 274<br>Male: -<br>Female: -     | -           | -    | -    | -     | 21 (7.7)  | 1.8         | 5.8        | -         | -         |
| Tavazzi et al (41)      | Europe        | 54<br>Male: -<br>Female: -      | -           | -    | -    | -     | 10 (18.5) | 14.8 (75.0) | 3.7 (100)  | -         | -         |
| Thomas et al (42)       | Europe        | 63<br>Male: 44<br>Female: 19    | -           | 2    | 2    | 8     | 6 (9.5)   | 1.6 (100)   | 7.9 (20.0) | -         | -         |
| Trimaille et al (43)    | Europe        | 289<br>Male: 171<br>Female: 118 | 62.2 ± 17   | -    | -    | 12    | 49 (17.0) | 4.2         | 14.5*      | -         | -         |



|                   |               |                               |                |     |     |    |              |                |     |         |         |
|-------------------|---------------|-------------------------------|----------------|-----|-----|----|--------------|----------------|-----|---------|---------|
| Voicu et al (44)  | Europe        | 56<br>Male: 42<br>Female: 14  | -              | -   | 0   | 14 | 20<br>(35.7) | 35.7<br>(45.0) | -   | -       | -       |
| Whyte et al (45)  | Europe        | 1477<br>Male: -<br>Female: -  | -              | -   | -   | -  | 80<br>(5.4)  | -              | 5.4 | -       | -       |
| Wright et al (46) | North America | 44<br>Male: 28<br>Female: 16  | 54<br>(42-59)  | -   | -   | -  | 11<br>(25.0) | -              | -   | -       | -       |
| Xu et al (47)     | Asia          | 138<br>Male: 81<br>Female: 57 | 52.4 ±<br>16.7 | 2.9 | -   | 18 | 4<br>(2.9)   | 2.9            | 0   | 6 (4.3) | 1 (0.7) |
| Zerwes et al (48) | Europe        | 20<br>Male: 14<br>Female: 6   | 63.7 ±<br>14.3 | -   | -   | -  | 4<br>(20.0)  | 20.0           | -   | -       | -       |
| Zhang et al (49)  | Asia          | 143<br>Male: 74<br>Female: 69 | 63 ± 14        | 4.9 | 0.7 | -  | 66<br>(46.2) | 46.2           | -   | -       | -       |

\*Five patients had pulmonary embolism and concomitant deep vein thrombosis.

**Abbreviations:** ICU, intensive care unit; NA, VTE, venous thromboembolism; DVT, deep vein thrombosis; PE, pulmonary embolism; IDVT, isolated distal deep vein thrombosis; CAT, catheter-associated thrombosis; ISSPE, isolated subsegmental pulmonary embolism.

**e-Table 3. Risk of bias assessment (Newcastle-Ottawa for non-randomized studies)**

| <b>Study</b>                | <b>Selection</b> | <b>Comparability</b> | <b>Outcome</b> | <b>Total score</b> |
|-----------------------------|------------------|----------------------|----------------|--------------------|
| Al-Samkari et al (1)        | 3                | 2                    | 3              | 8                  |
| Artifoni et al (2)          | 4                | 2                    | 3              | 9                  |
| Beun et al (3)              | 3                | 1                    | 2              | 6                  |
| Bilaloglu et al (4)         | 3                | 2                    | 2              | 7                  |
| Cattaneo et al (5)          | 4                | 2                    | 2              | 8                  |
| Chen J et al (6)            | 3                | 2                    | 2              | 7                  |
| Chen S et al (7)            | 3                | 2                    | 3              | 8                  |
| Criel et al (8)             | 3                | 1                    | 3              | 7                  |
| Cui et al (9)               | 3                | 1                    | 2              | 6                  |
| Demelo-Rodriguez et al (10) | 3                | 2                    | 3              | 8                  |
| Desborough et al (11)       | 3                | 2                    | 3              | 8                  |
| Dubois-Silva et al (12)     | 4                | 2                    | 3              | 9                  |
| Fauvel et al (13)           | 4                | 2                    | 2              | 8                  |
| Fraisse et al (14)          | 3                | 2                    | 3              | 8                  |
| Grandmaison et al (15)      | 3                | 2                    | 3              | 8                  |
| Grillet et al (16)          | 3                | 1                    | 2              | 6                  |
| Hekimian et al (17)         | 3                | 0                    | 2              | 5                  |
| Helms et al (18)            | 4                | 2                    | 3              | 9                  |
| Hippensteel et al (19)      | 3                | 2                    | 2              | 7                  |
| Klok et al (20)             | 3                | 1                    | 3              | 7                  |
| Klok et al (21)             | 3                | 1                    | 3              | 7                  |
| Koleilat et al (22)         | 3                | 2                    | 2              | 7                  |
| Llitjos et al (23)          | 4                | 2                    | 2              | 8                  |
| Lodigiani et al (24)        | 4                | 2                    | 3              | 9                  |
| Longchamp et al (25)        | 4                | 2                    | 3              | 9                  |
| Maatman et al (26)          | 4                | 2                    | 3              | 9                  |
| Mazzaccaro et al (27)       | 4                | 1                    | 2              | 7                  |
| Mei et al (28)              | 4                | 2                    | 3              | 9                  |

*Online supplements are not copyedited prior to posting and the author(s) take full responsibility for the accuracy of all data.*



|                         |   |   |   |   |
|-------------------------|---|---|---|---|
| Mestre-Gomez et al (29) | 3 | 0 | 2 | 5 |
| Middeldorp et al (30)   | 4 | 2 | 3 | 9 |
| Minuz et al (31)        | 3 | 1 | 3 | 7 |
| Moll et al (32)         | 3 | 2 | 3 | 8 |
| Nahum et al (33)        | 4 | 2 | 2 | 8 |
| Patell et al (34)       | 4 | 2 | 3 | 9 |
| Pesavento et al (35)    | 4 | 2 | 3 | 9 |
| Poissy et al (36)       | 3 | 0 | 3 | 6 |
| Ren et al (37)          | 3 | 1 | 3 | 7 |
| Rieder et al (38)       | 3 | 2 | 3 | 8 |
| Santoliquido et al (39) | 4 | 2 | 3 | 9 |
| Stoneham et al (40)     | 3 | 0 | 2 | 5 |
| Tavazzi et al (41)      | 3 | 0 | 2 | 5 |
| Thomas et al (42)       | 3 | 2 | 3 | 8 |
| Trimaille et al (43)    | 4 | 1 | 3 | 8 |
| Voicu et al (44)        | 4 | 1 | 3 | 8 |
| Whyte et al (45)        | 3 | 2 | 2 | 7 |
| Wright et al (46)       | 2 | 0 | 2 | 4 |
| Xu et al (47)           | 3 | 2 | 3 | 8 |
| Zerwes et al (48)       | 3 | 1 | 2 | 6 |
| Zhang et al (49)        | 3 | 2 | 3 | 8 |

**e-Figure 1. Funnel plots**

**a) VTE**

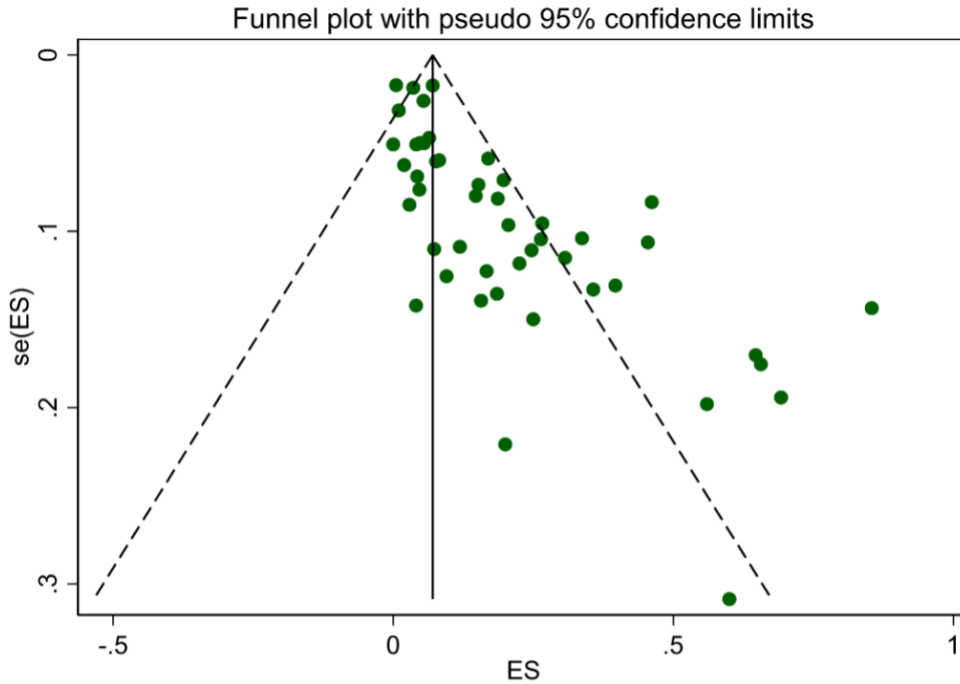

**b) Bleeding**

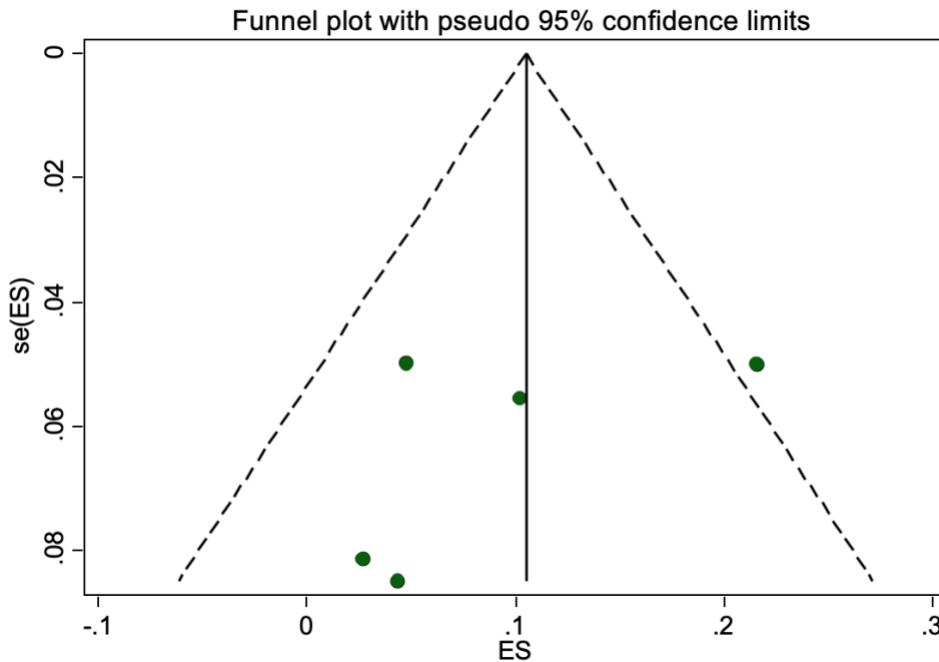

**e-Figure 2. Forest plots for additional analyses**

**a) VTE: type**

**DVT**

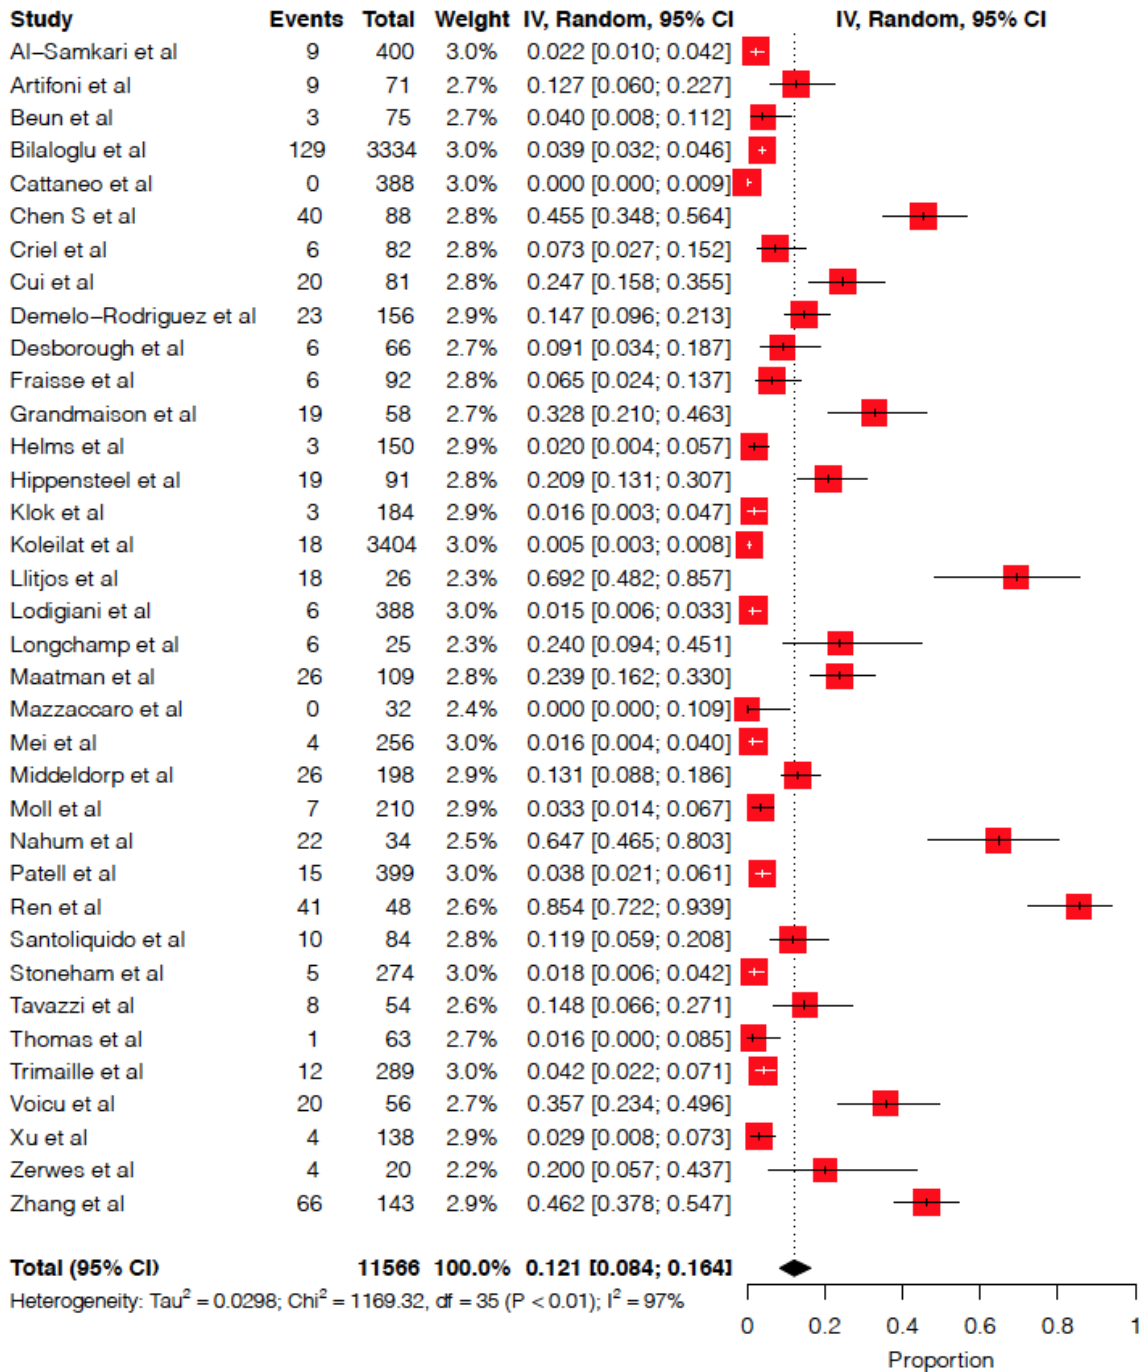

## PE

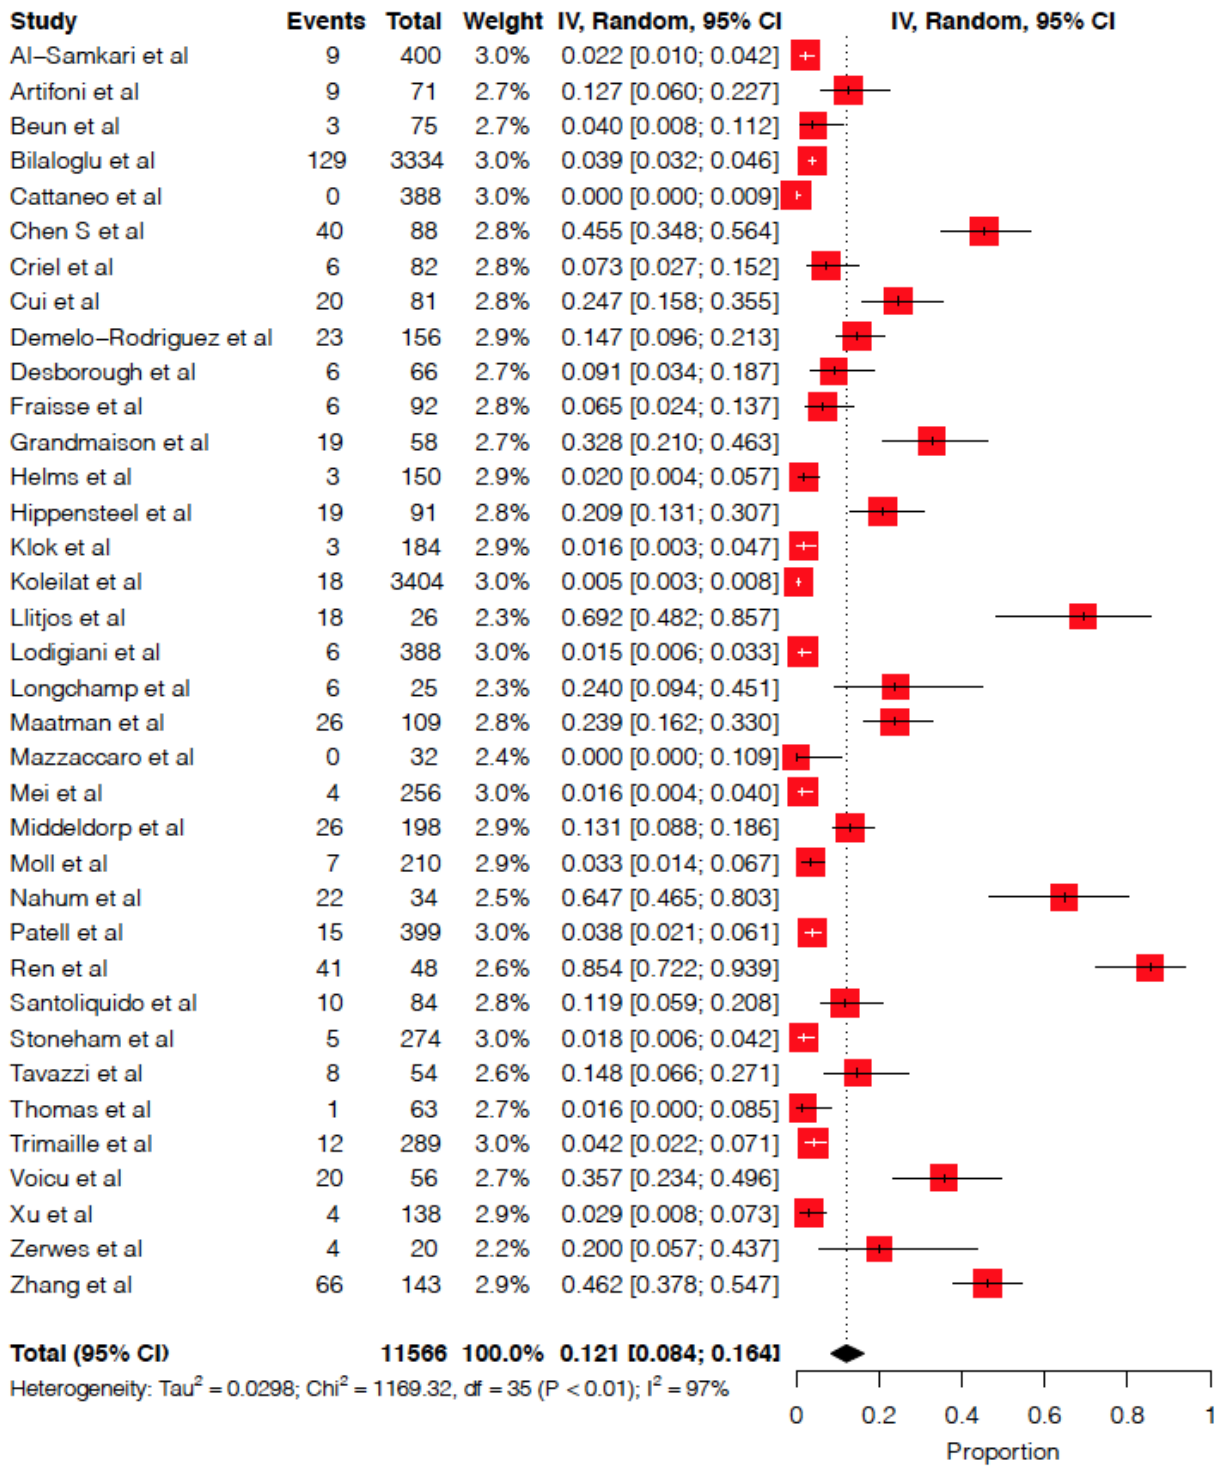

**b) VTE: Setting**

**Ward**

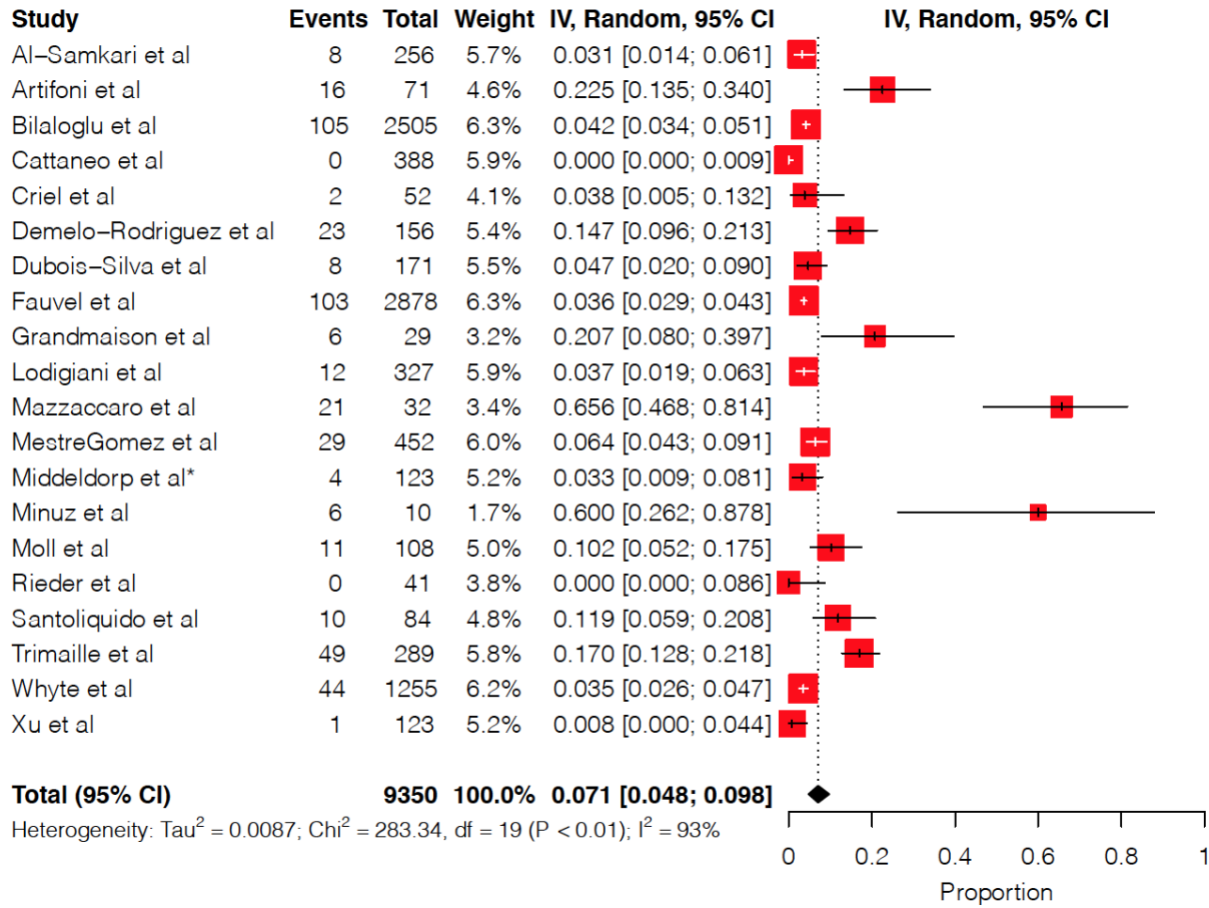

\*Shortest assessment period.

**ICU**

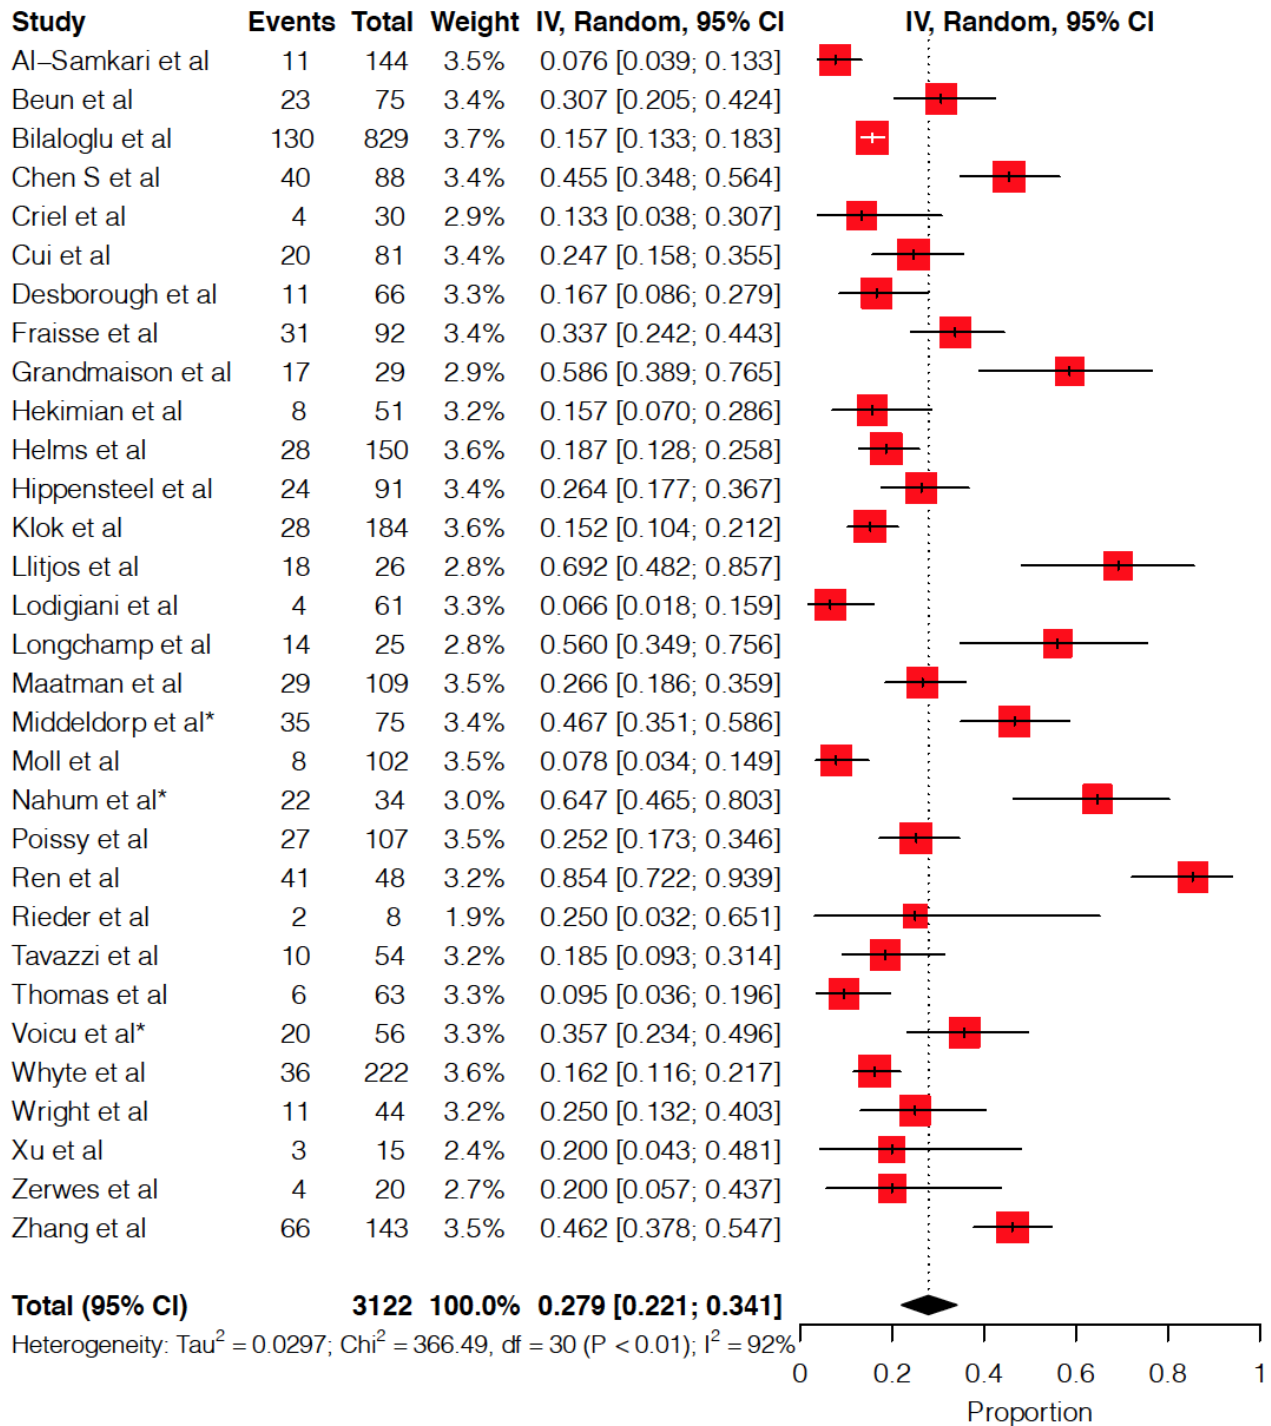

\*Shortest assessment period.

**c) VTE: Type of assessment**

**Screening**

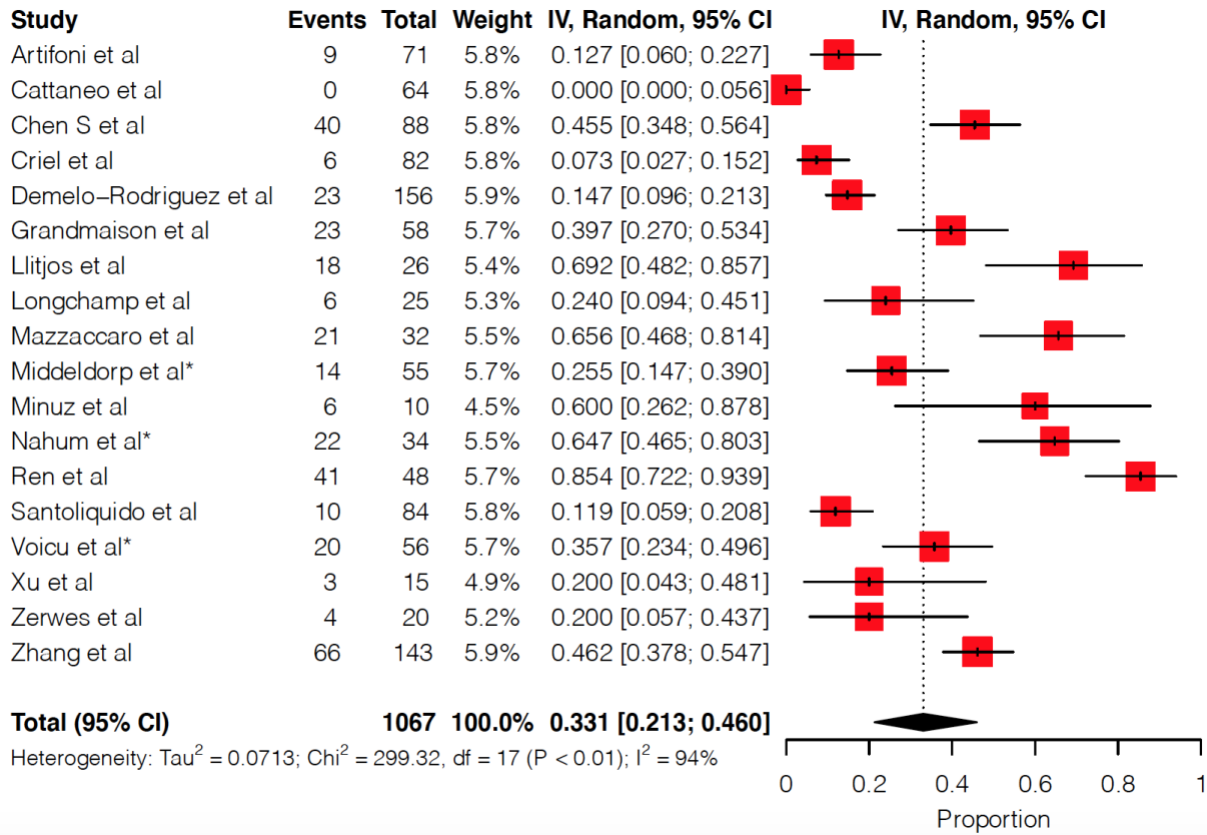

\*Shortest assessment period.

### Clinical diagnosis

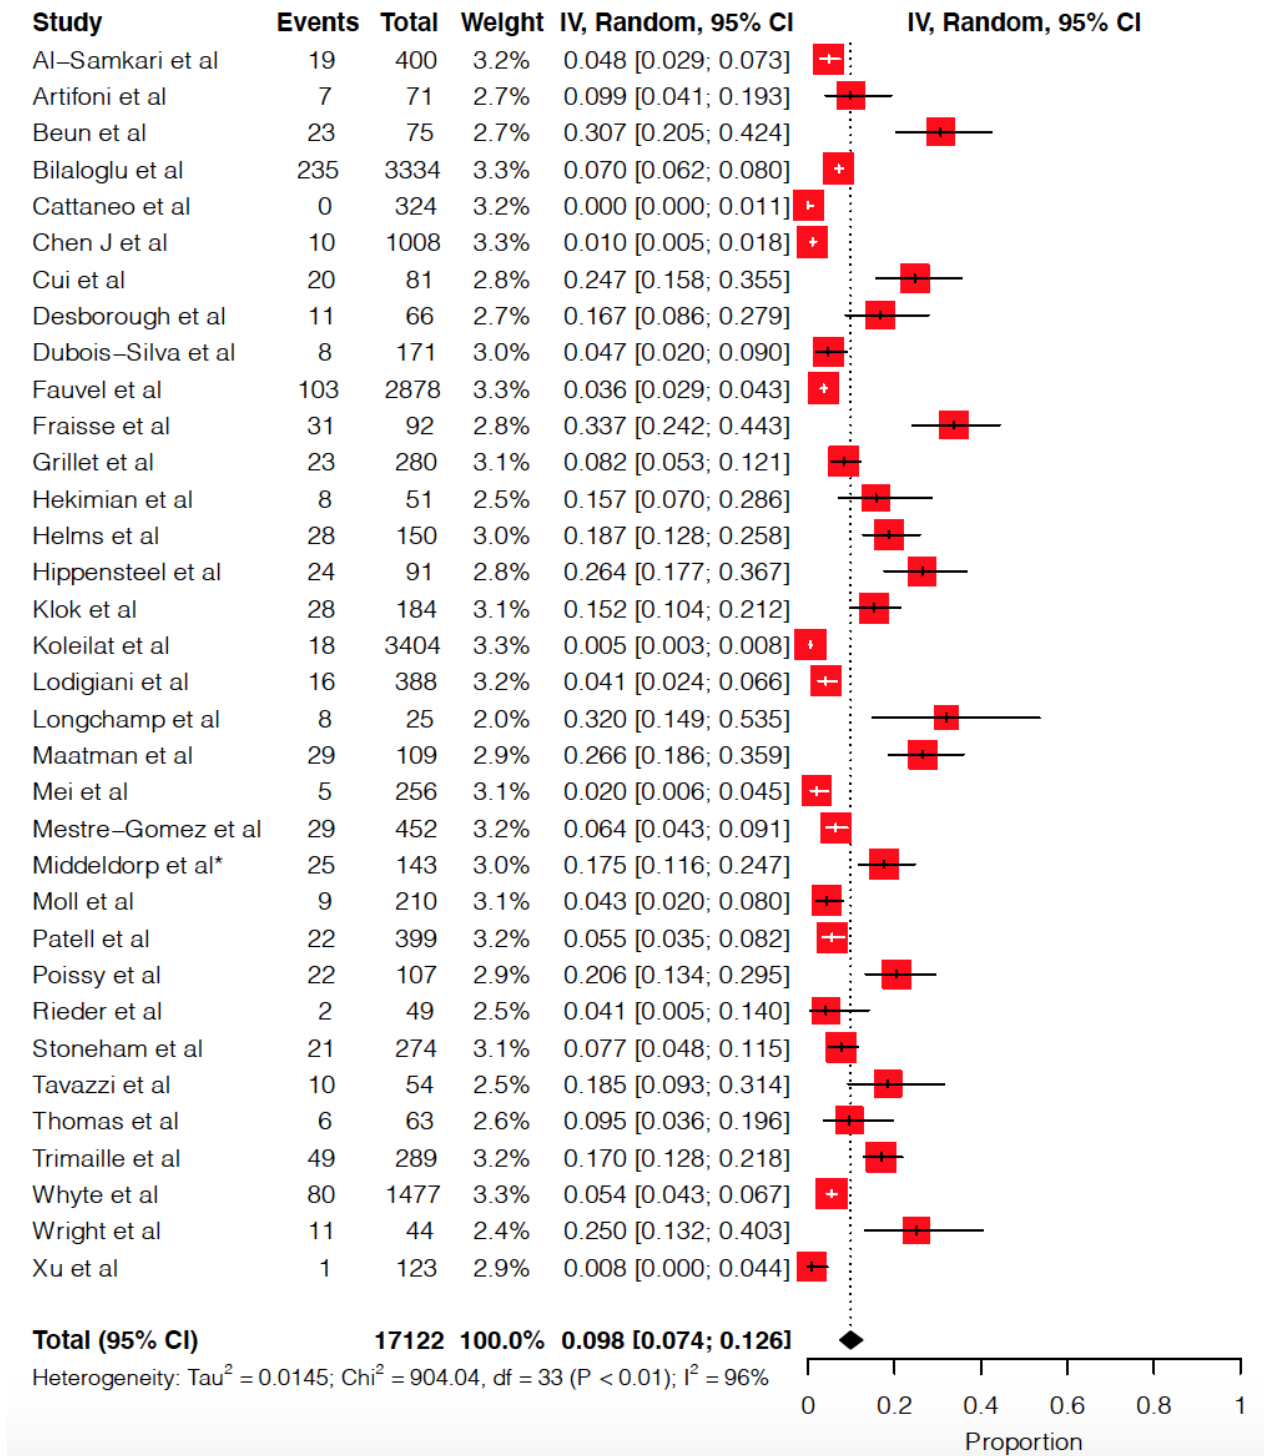

\*Shortest assessment period.



**d) VTE: Intensity of pharmacological thromboprophylaxis**

**No prophylaxis**

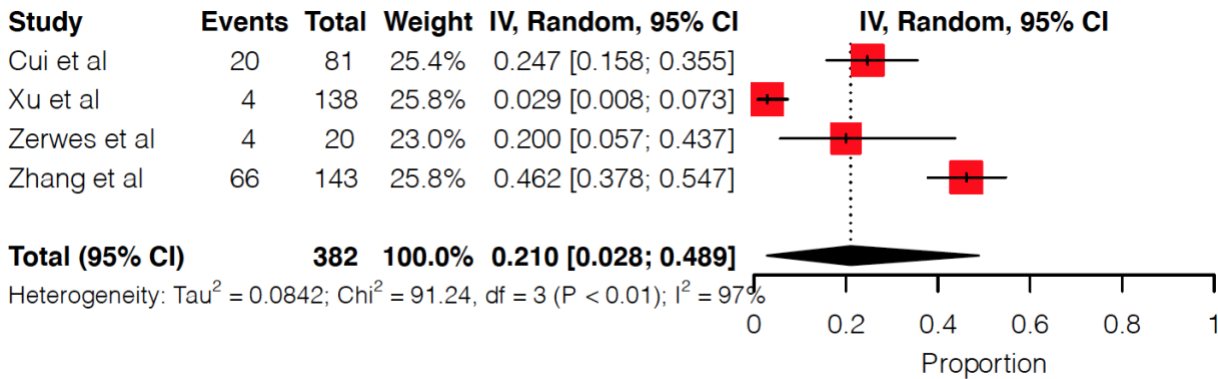

**Standard dose prophylaxis**

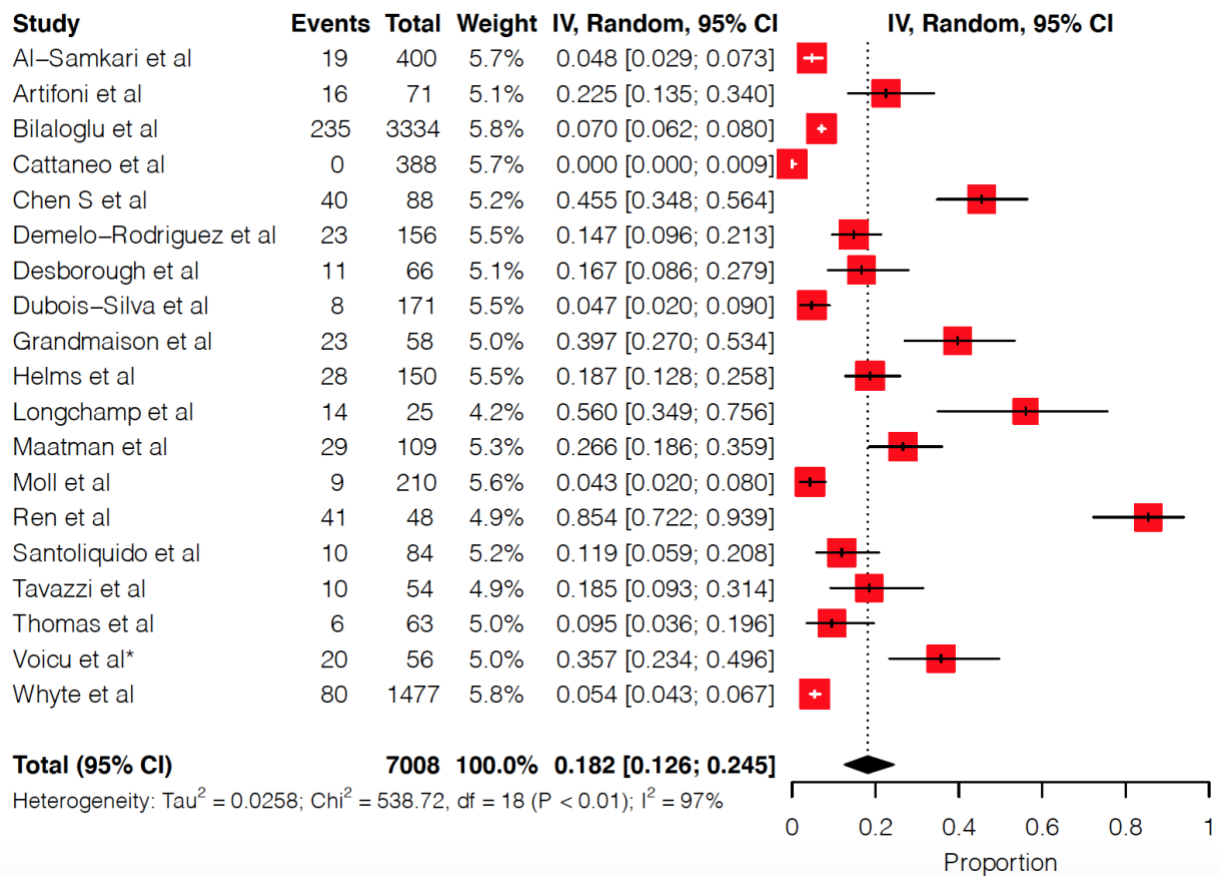

\*Shortest assessment period.

### Intermediate dose or full anticoagulation

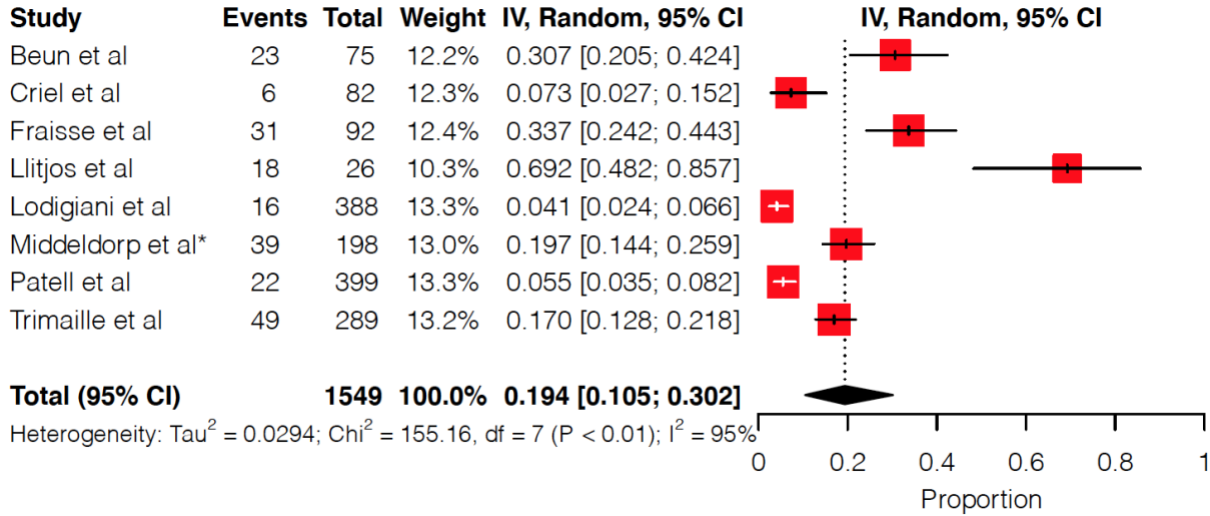

\*Shortest assessment period.

### e) VTE: Geographical area

#### North America

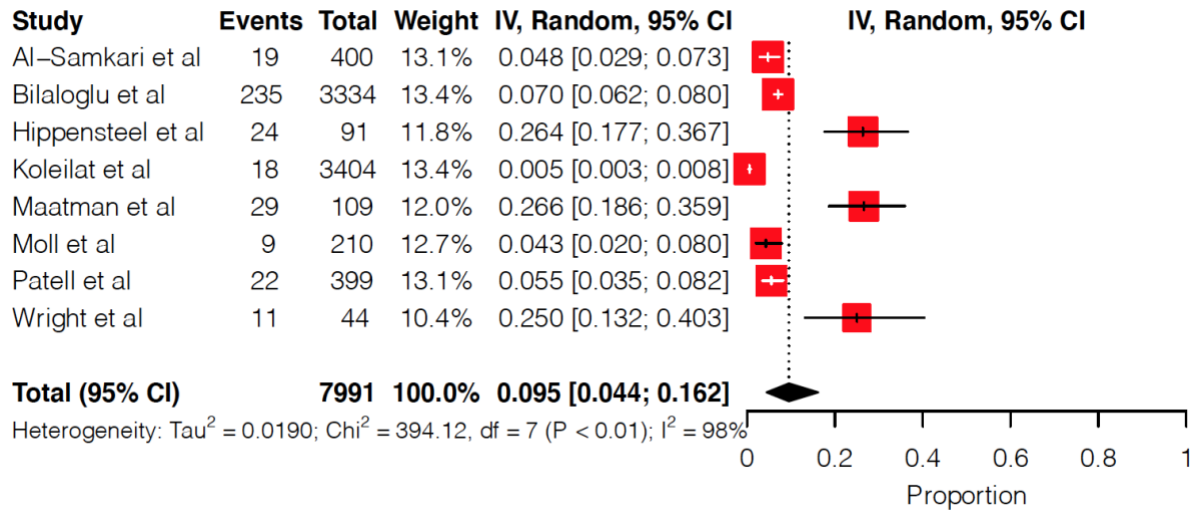

**Europe**

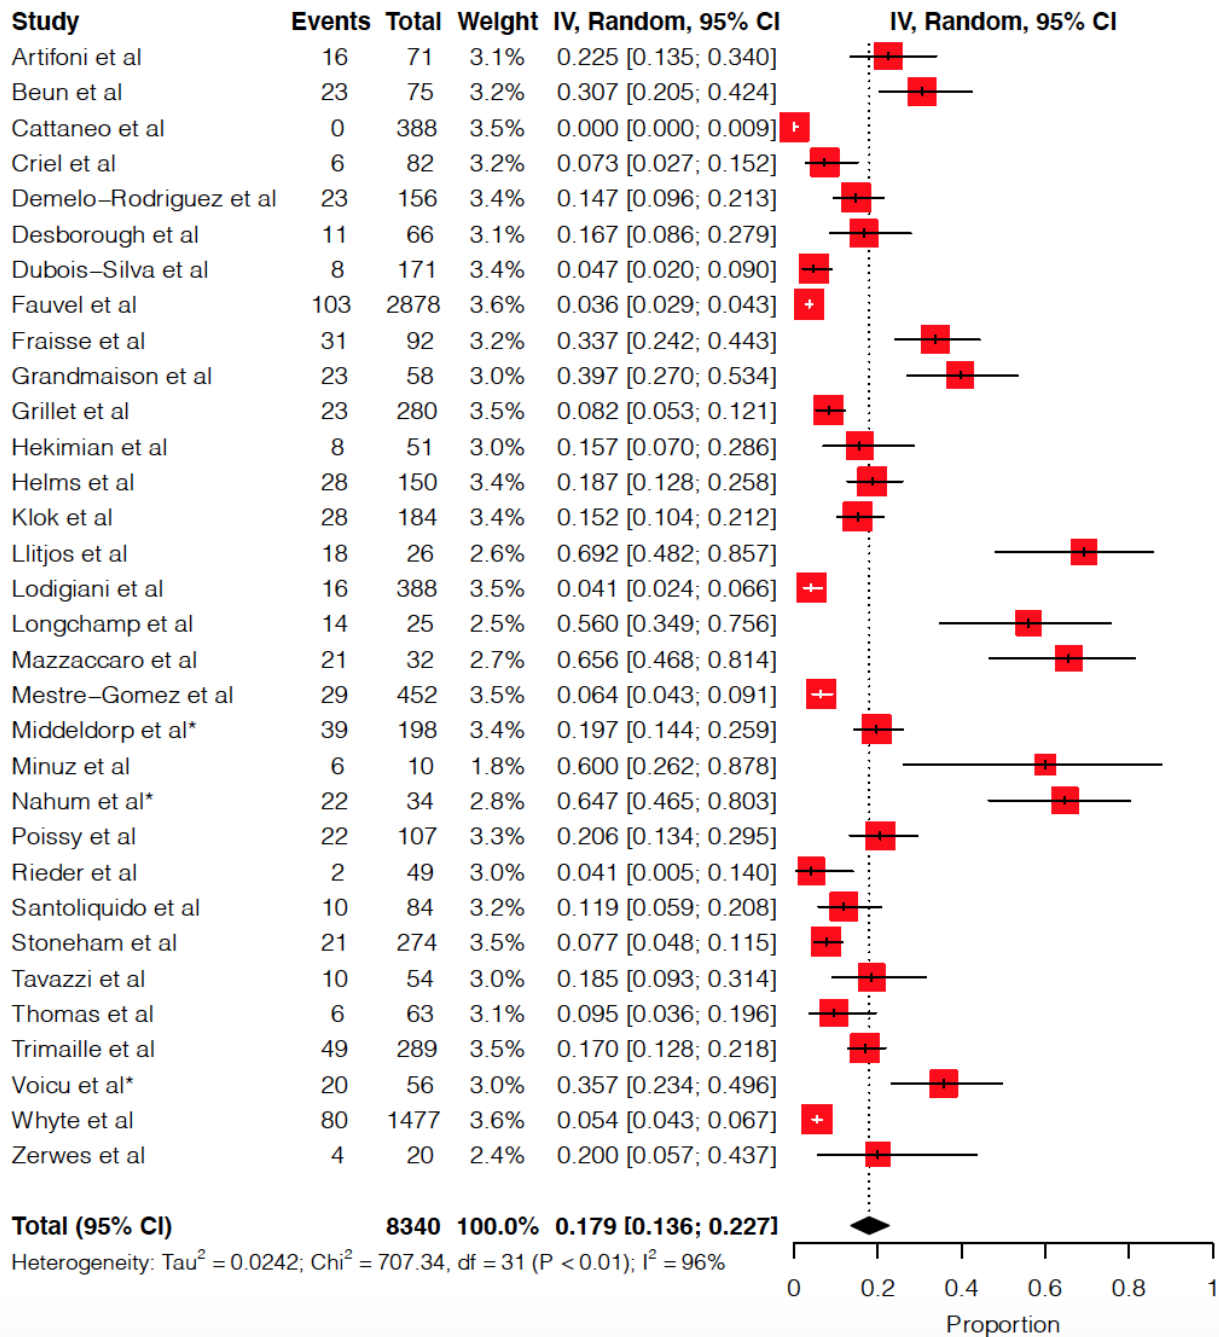

\*Shortest assessment period.

## Rest of World

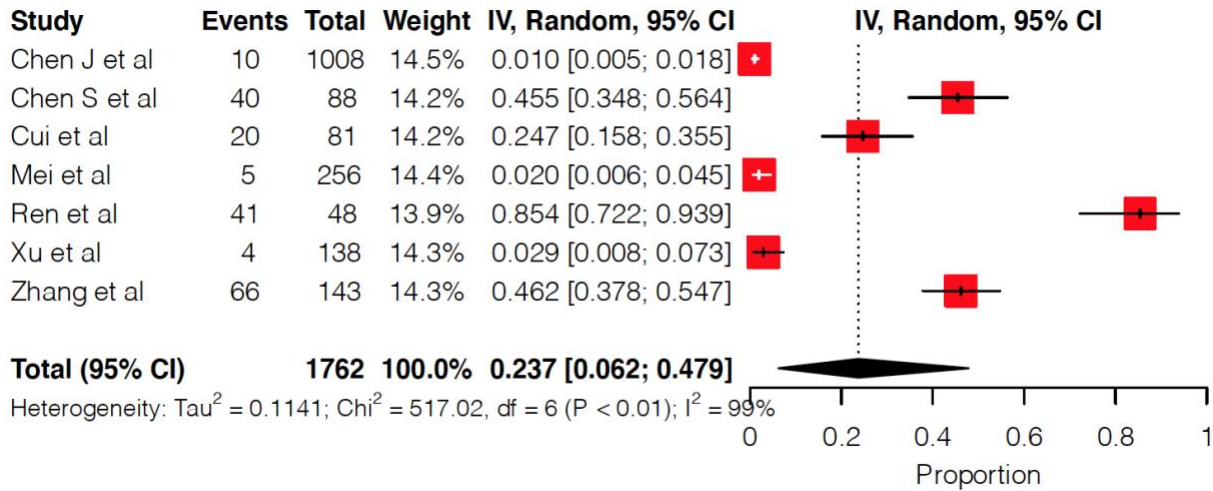

## f) VTE: Design

### Prospective

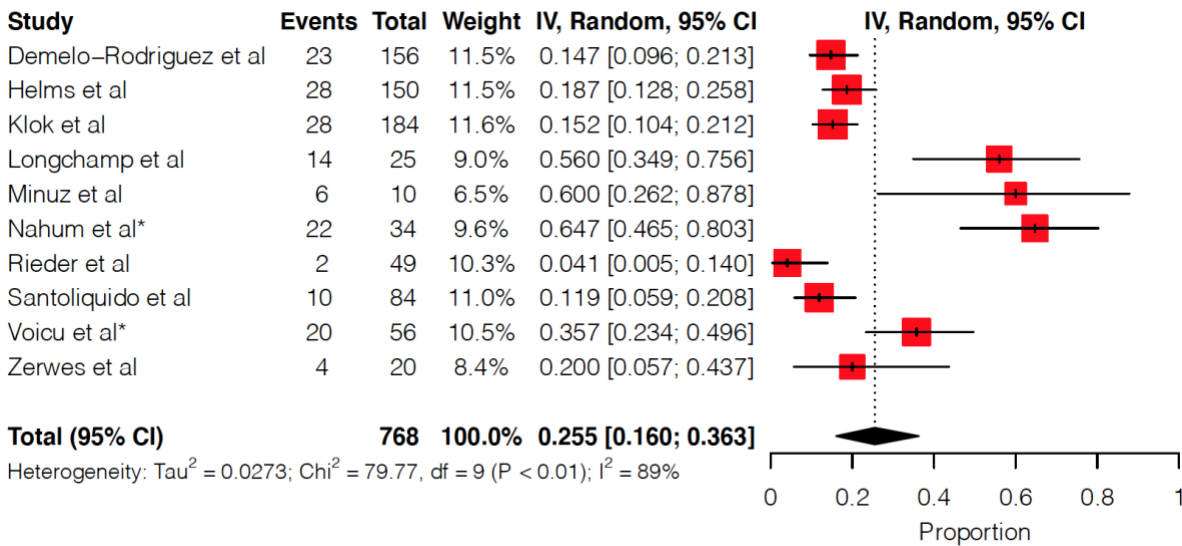

\*Shortest assessment period.

**Retrospective**

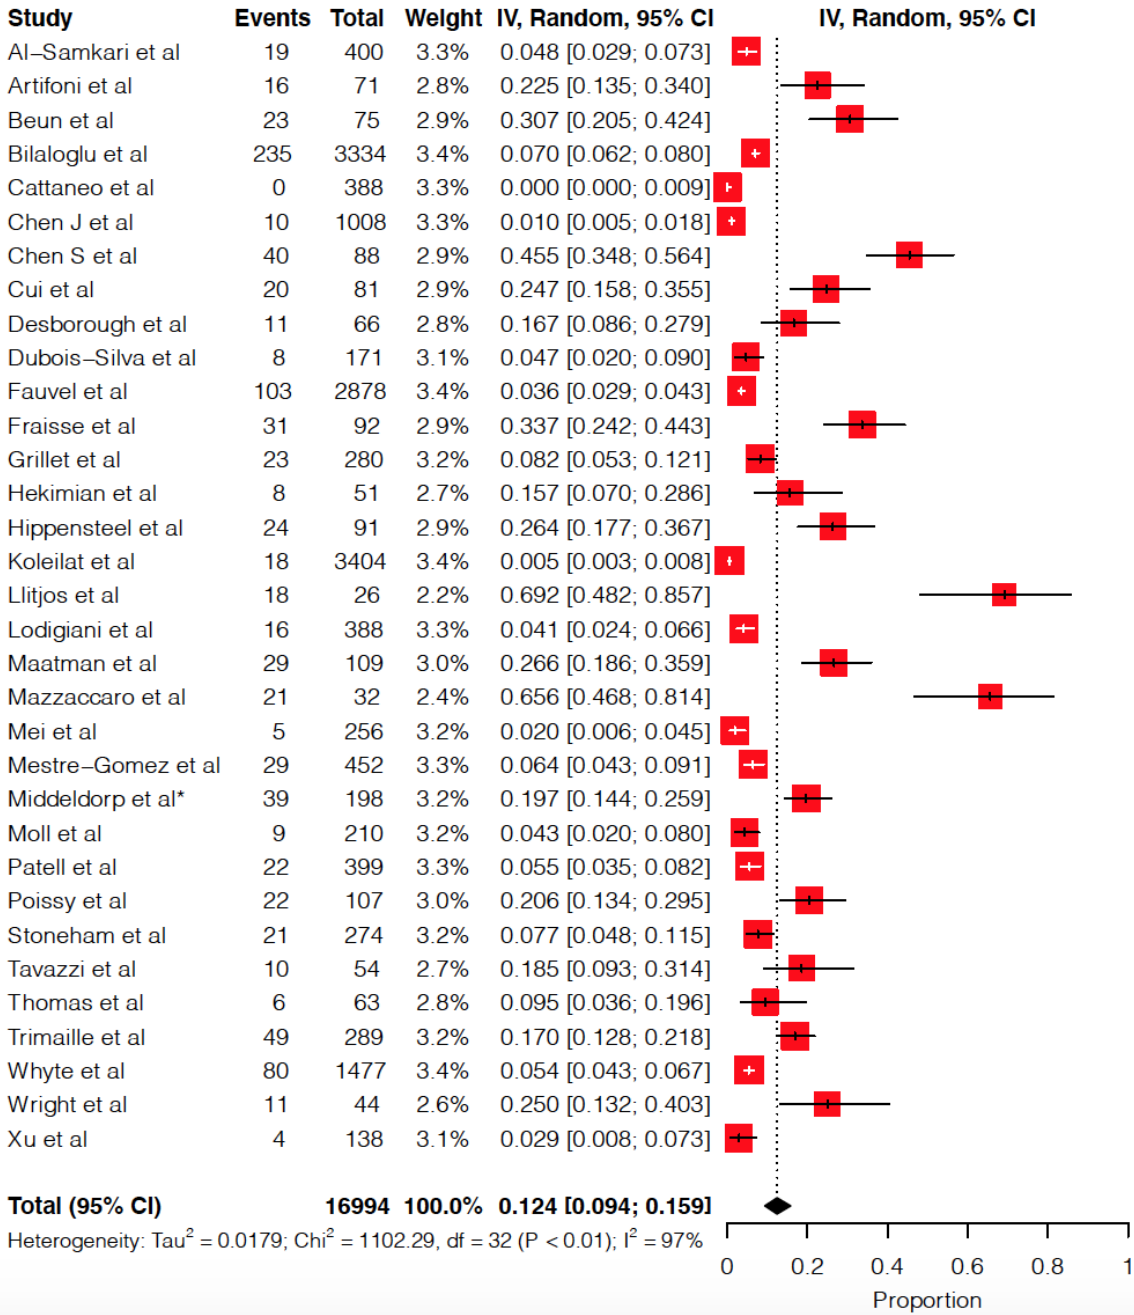

\*Shortest assessment period.

**g) VTE: After exclusion catheter-related thrombosis/isolated distal DVT and isolated subsegmental PE**

**DVT without catheter-related thrombosis/isolated distal DVT**

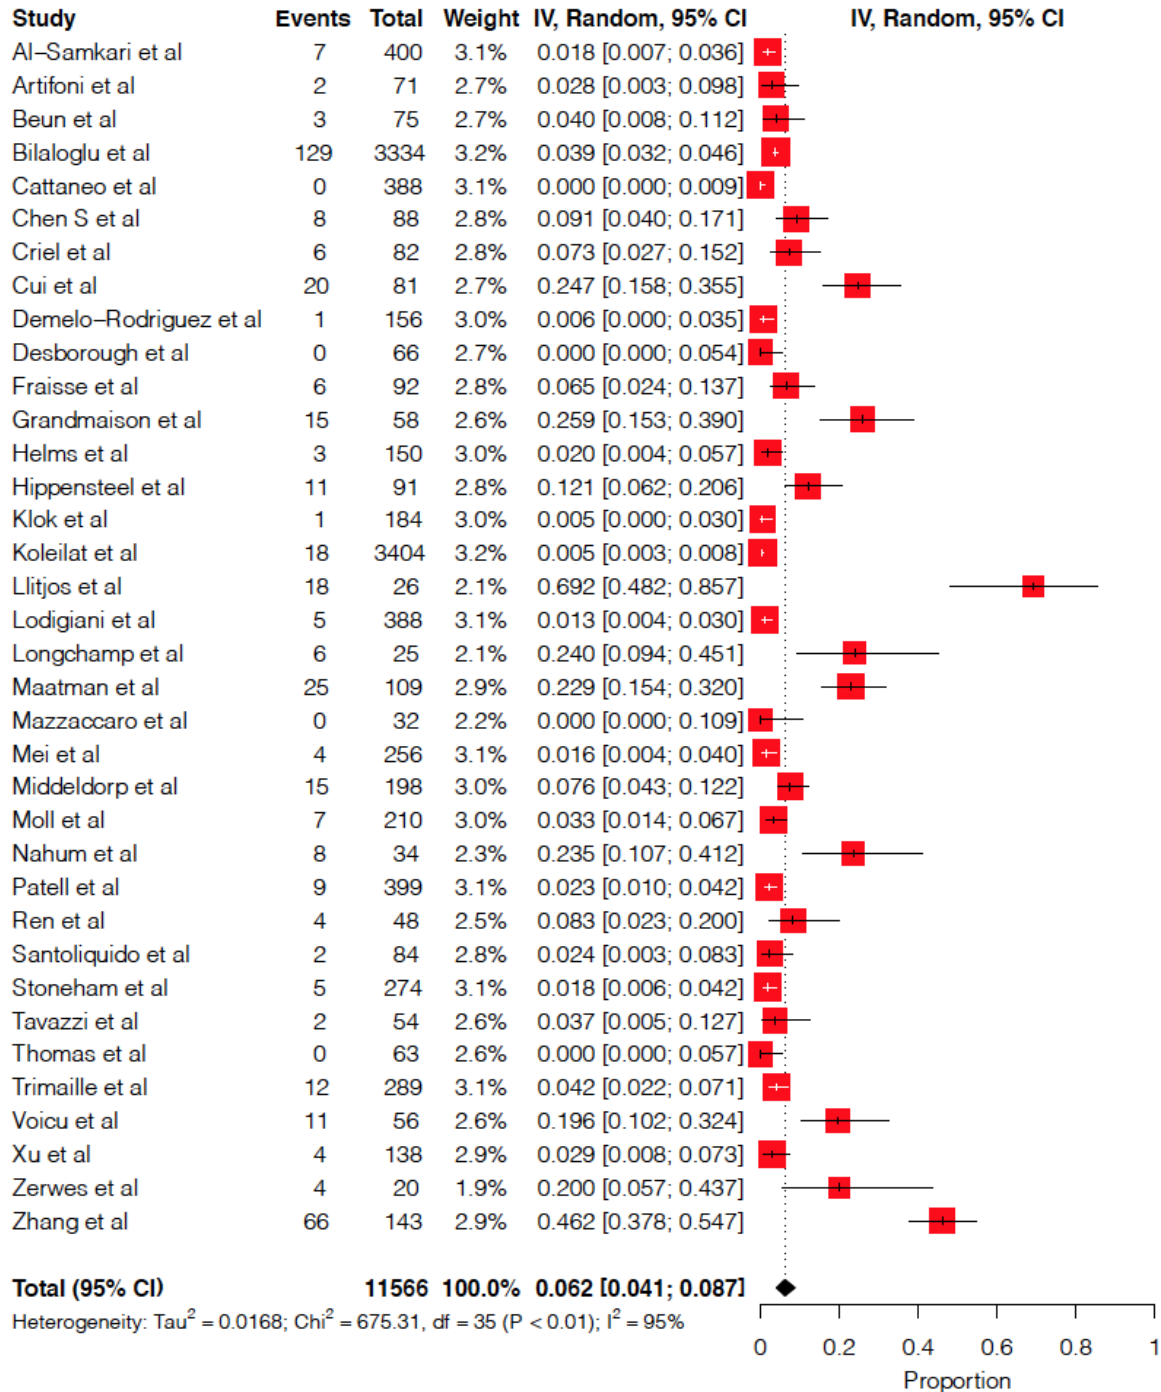

## PE without isolated subsegmental episodes

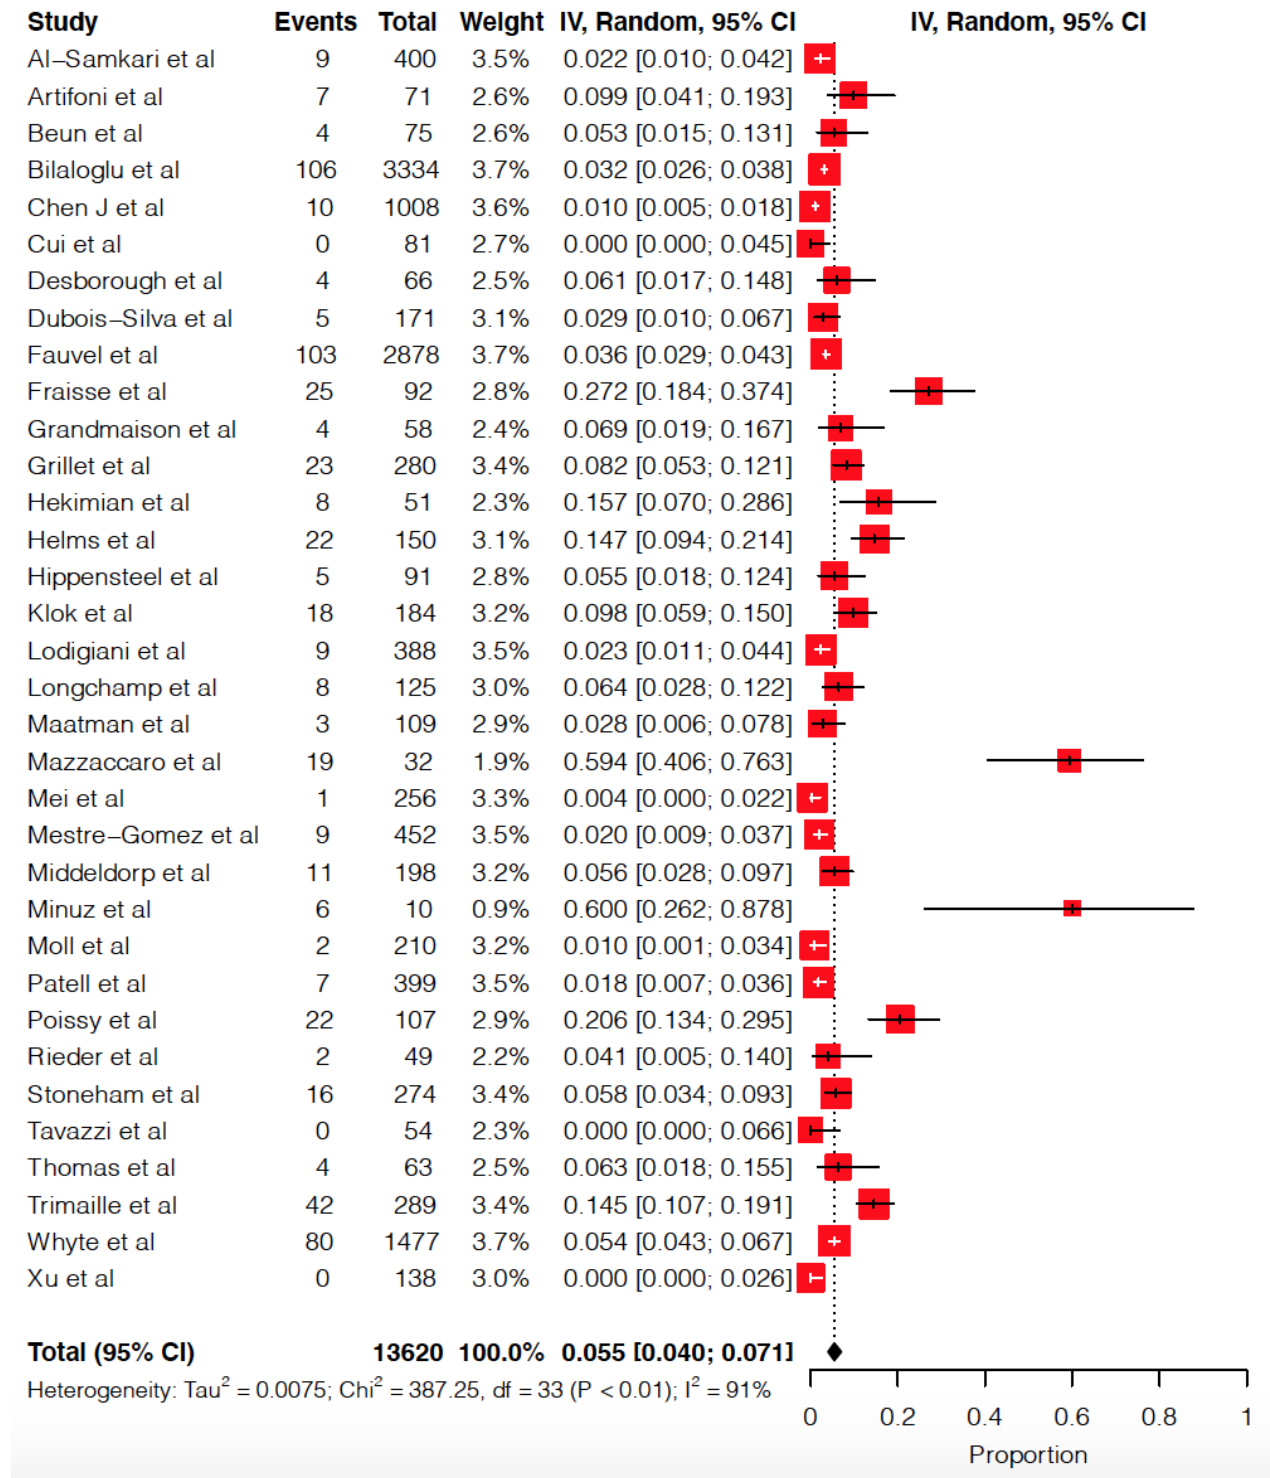

### h) Bleeding: Major bleeding events

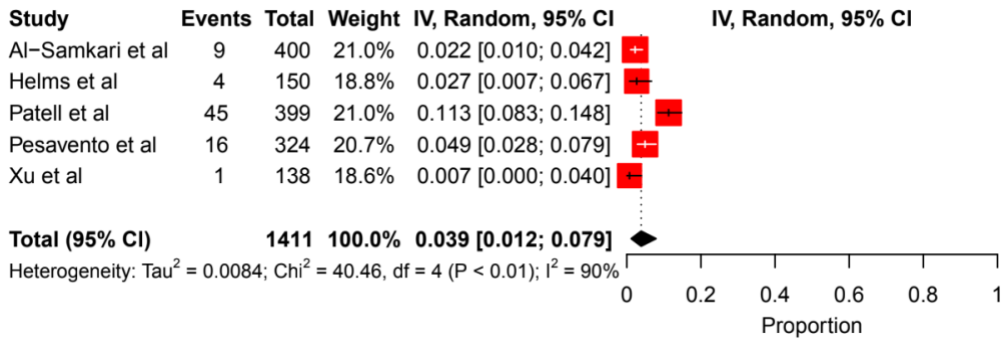

### i) Bleeding: Setting

#### Ward

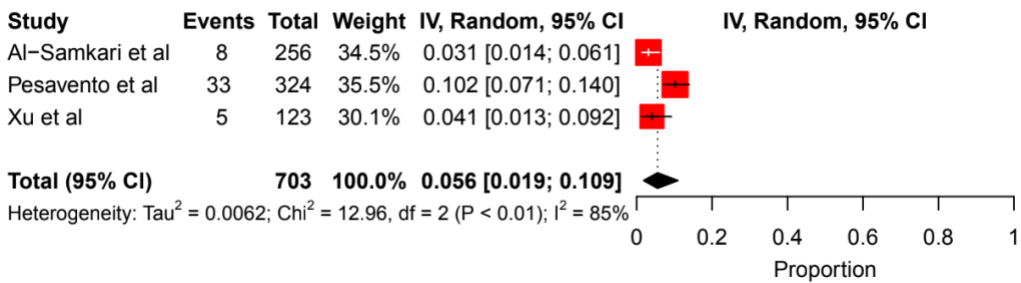

#### ICU

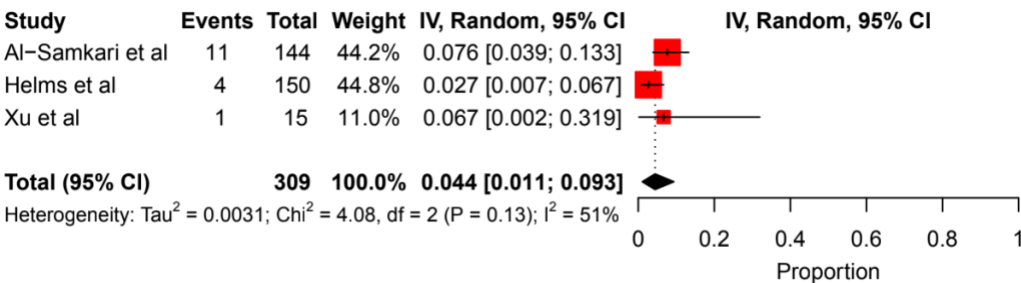



## j) Bleeding: Design

### Prospective

Only one study.

### Retrospective

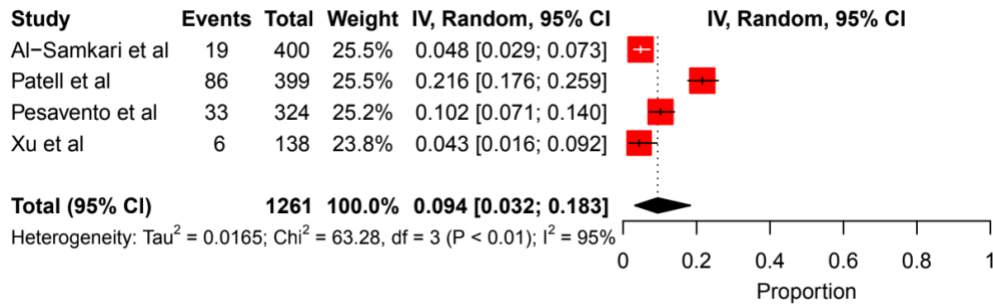

## j) Bleeding: Intensity of pharmacological thromboprophylaxis

### No prophylaxis

Only one study.

### Standard dose prophylaxis

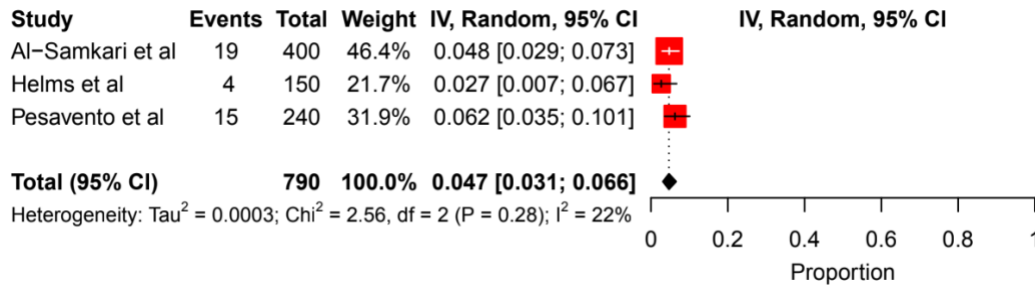

### Intermediate dose prophylaxis or full (therapeutic) anticoagulation

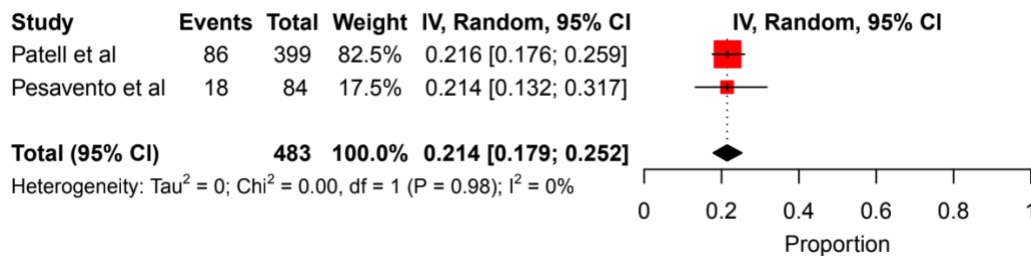

**e-Table 4. Subgroup meta-analyses according to the geographical area**

**a) VTE**

| <b>Geographical area</b> | <b>VTE</b>       | <b>DVT</b>      | <b>PE</b>       | <b>Ward</b>    | <b>ICU</b>       | <b>Screening</b> | <b>Clinical diagnosis</b> | <b>Prospective studies</b> | <b>Retrospective studies</b> |
|--------------------------|------------------|-----------------|-----------------|----------------|------------------|------------------|---------------------------|----------------------------|------------------------------|
| North America            | 9.5 (4.4-16.2)   | 5.8 (2.8-10.0)  | 2.4 (1.6-3.4)   | 4.8 (2.5-7.8)  | 16.9 (10.9-23.7) | -                | 9.5 (4.4-16.2)            | -                          | 9.5 (4.4-16.2)               |
| Europe                   | 17.9 (13.6-22.7) | 10.8 (6.2-16.3) | 10.8 (8.0-14.0) | 8.7 (5.3-12.8) | 27.4 (20.7-34.7) | 28.0 (16.6-41.0) | 11.3 (8.1-14.9)           | 25.5 (16.0-36.3)           | 14.5 (10.2-19.4)             |
| Rest Of World            | 23.7 (6.2-47.9)  | 30.0 (7.8-59.0) | 0.8 (0.4-1.3)   | 0.8 (0.0-4.5)  | 45.5 (26.6-65.1) | 51.3 (30.3-72.0) | 4.5 (0.6-11.7)            | -                          | 10.8 (1.8-25.8)              |

**b) Bleeding**

| <b>Geographical area</b> | <b>Bleeding</b> | <b>Major bleeding</b> | <b>Ward</b>     | <b>ICU</b>     | <b>Prospective studies</b> | <b>Retrospective studies</b> | <b>No prophylaxis</b> | <b>Standard-dose prophylaxis</b> | <b>Intermediate-dose prophylaxis or therapeutic anticoagulation</b> |
|--------------------------|-----------------|-----------------------|-----------------|----------------|----------------------------|------------------------------|-----------------------|----------------------------------|---------------------------------------------------------------------|
| North America            | 12.0 (0.9-32.7) | 6.1 (0.4-17.8)        | 3.1 (1.4-6.1)   | 7.6 (3.9-13.3) | -                          | 12.0 (0.9-32.7)              | -                     | 4.8 (2.9-7.3)                    | 21.6 (17.6-25.9)                                                    |
| Europe                   | 6.3 (1.0-15.4)  | 4.3 (2.5-6.6)         | 10.2 (7.1-14.0) | 2.7 (0.7-6.7)  | 2.7 (0.7-6.7)              | 10.2 (7.1-14.0)              | -                     | 4.7 (1.9-8.7)                    | 21.4 (13.2-31.7)                                                    |
| Rest Of World            | 4.4 (1.6-9.2)   | 0.7 (0.0-4.0)         | 4.1 (1.3-9.2)   | 6.7 (0.2-32.0) | -                          | 4.4 (1.6-9.2)                | 4.4 (1.6-9.2)         | -                                | -                                                                   |

**e-Figure 3. Sensitivity analyses**

**a) Outcomes from the longest available follow-up points in studies reporting outcomes at multiple time points**

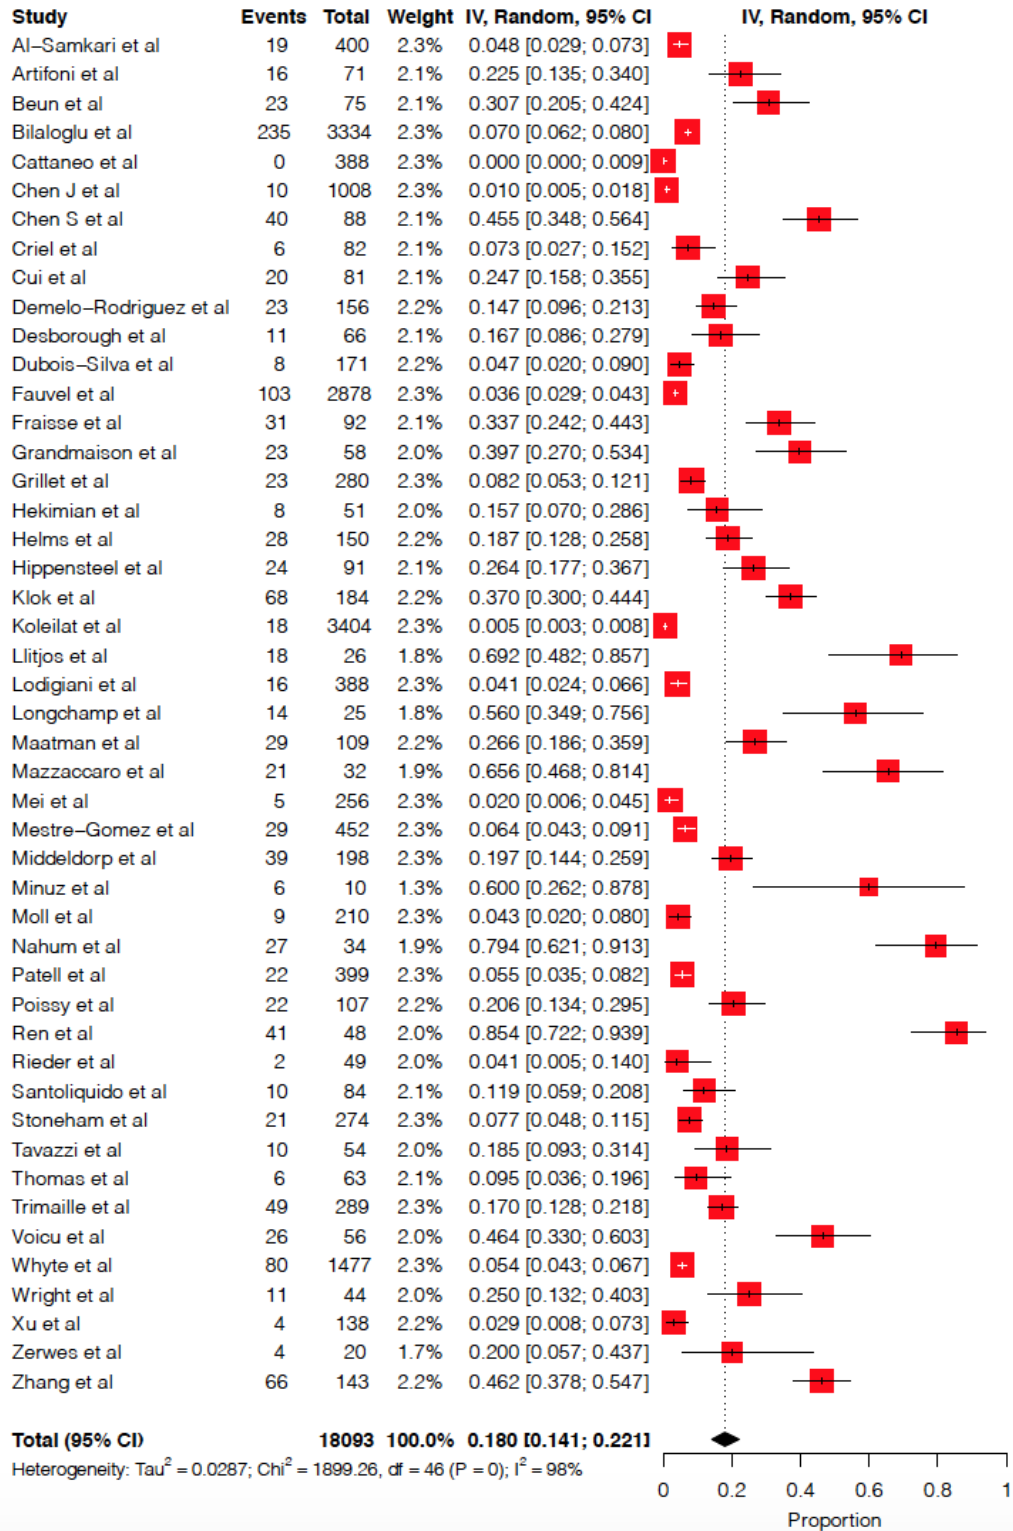

**b) VTE: inverse variance fixed-effects models.**

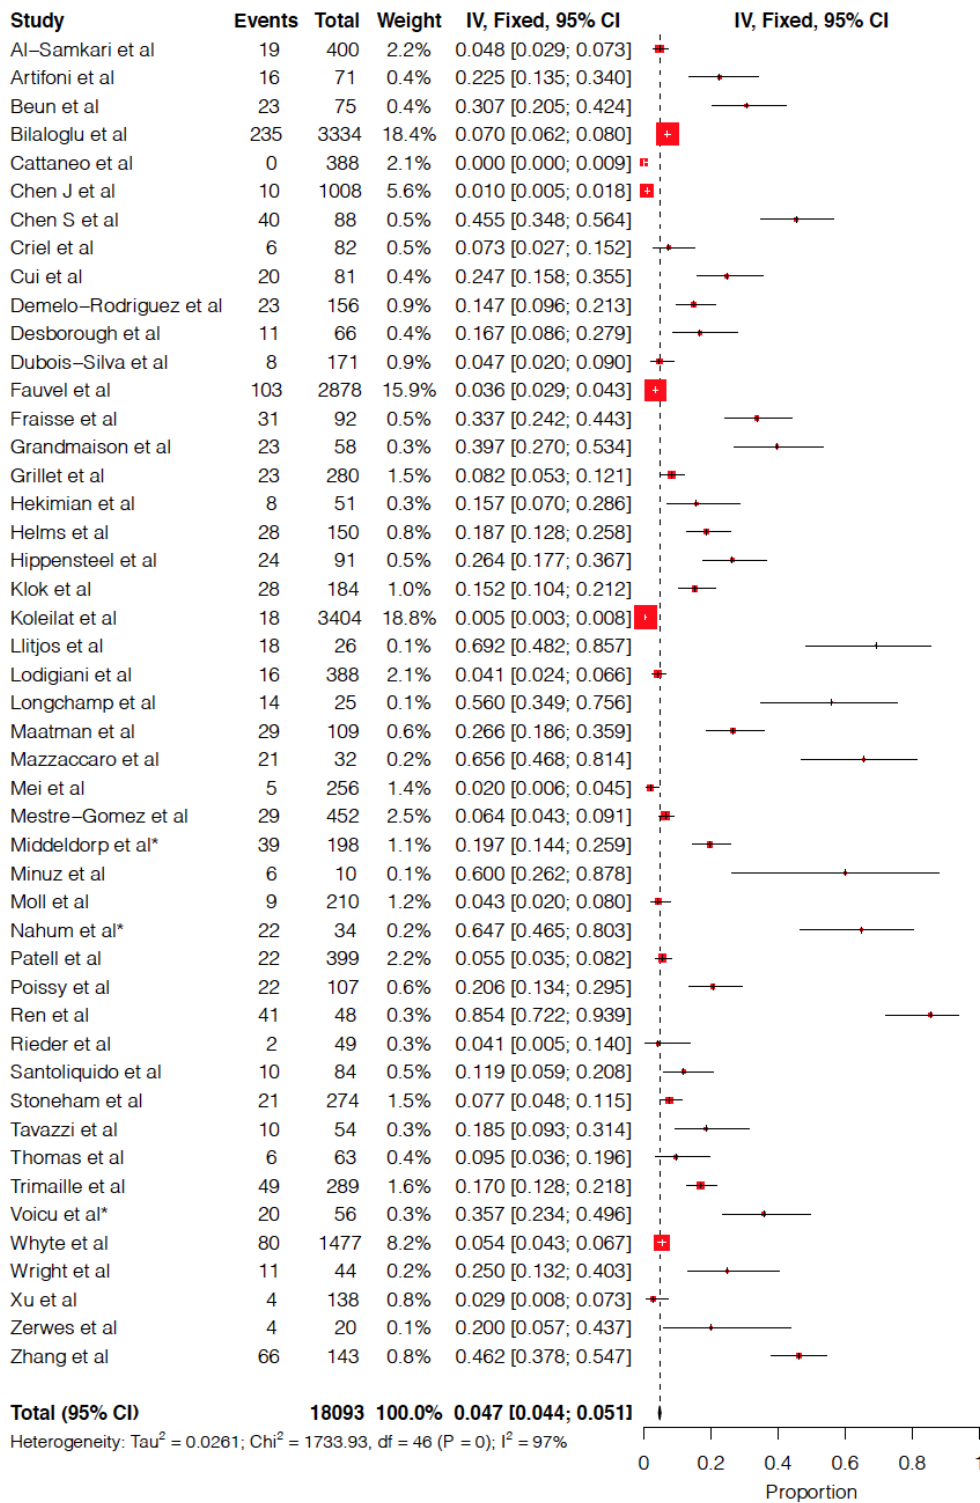

\*Shortest assessment period.

**c) Bleeding: inverse variance fixed-effects models.**

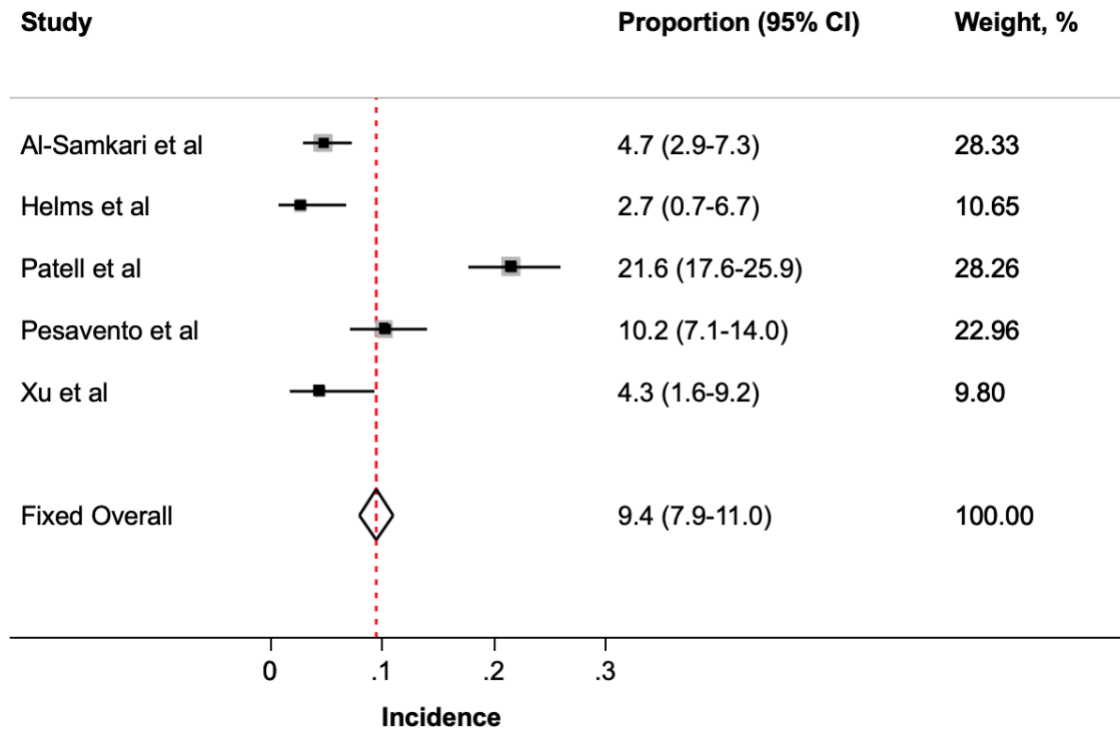

## References

1. Al-Samkari H, Karp Leaf RS, Dzik WH, Carlson JC, Fogerty AE, Waheed A, Goodarzi K, Bendapudi P, Bornikova L, Gupta S, Leaf D, Kuter DJ, Rosovsky RP. COVID and coagulation: bleeding and thrombotic manifestations of SARS-CoV2 infection. *Blood* 2020 Jun 3; blood.2020006520. doi: 10.1182/blood.2020006520.
2. Artifoni M, Danic G, Gautier G, Gicquel P, Boutoille D, Raffi F, Néel A, Lecomte R. Systematic assessment of venous thromboembolism in COVID-19 patients receiving thromboprophylaxis: incidence and role of D-dimer as predictive factors. *J Thromb Thrombolysis* 2020; 50: 211-216.
3. Beun R, Kusadasi N, Sikma M, Westerink J, Huisman A. Thromboembolic events and apparent heparin resistance in patients infected with SARS-CoV-2. *Int J Lab Hematol* 2020; 42 Suppl 1: 19-20.
4. Bilaloglu S, Aphinyanaphongs Y, Jones S, Iturrate E, Hochman J, Berger JS. Thrombosis in hospitalized patients with COVID-19 in a New York City Health System. *JAMA* 2020: e2013372.
5. Cattaneo M, Bertinato EM, Biocchi S, Brizio C, Malavolta D, Manzoni M, Muscarella G, Orlandi M. Pulmonary embolism or pulmonary thrombosis in COVID-19? Is the recommendation to use high-dose heparin for thromboprophylaxis justified? *Thromb Haemost* 2020; 120: 1230-1232.
6. Chen J, Wang X, Zhang S, Lin B, Wu X, Wang Y, Wang X, Yang M, Sun J, Xie Y. Characteristics of acute pulmonary embolism in patients with COVID-19 associated pneumonia from the city of Wuhan. *Clin Appl Thromb Hemost* 2020; 26: 1076029620936772.
7. Chen S, Zhang D, Zheng T, Yu Y, Jiang J. DVT incidence and risk factors in critically ill patients with COVID-19. *J Thromb Thrombolysis* 2020; 1-7. doi: 10.1007/s11239-020-02181-w.
8. Criel M, Falter M, Jaeken J, Van Kerrebroeck M, Lefere I, Meylaerts L, Mesotten D, Vander Laenen M, Fizez T, Thomeer M, Ruttens D. Venous thromboembolism in SARS-CoV-2 patients: only a problem in ventilated ICU patients, or is there more to it? *Eur Respir J* 2020; 56: 2001201.
9. Cui S, Chen S, Li X, Liu S, Wang F. Prevalence of venous thromboembolism in patients with severe novel coronavirus pneumonia. *J Thromb Haemost* 2020; 18: 1421-1424.
10. Demelo-Rodríguez P, Cervilla-Muñoz E, Ordieres-Ortega L, Parra-Virto A, Toledano-Macías M, Toledo-Samaniego N, García-García A, García-Fernández-Bravo I, Ji Z, de-Miguel-Diez J, Álvarez-Sala-Walther LA, Del-Toro-Cervera J, Galeano-Valle F. Incidence of asymptomatic deep vein thrombosis in patients with COVID-19 pneumonia and elevated D-dimer levels. *Thromb Res* 2020; 192: 23-26.
11. Desborough MJR, Doyle AJ, Griffiths A, Retter A, Breen KA, Hunt BJ. Image-proven thromboembolism in patients with severe COVID-19 in a tertiary critical care unit in the United Kingdom. *Thromb Res* 2020; 193: 1-4.
12. Dubois-Silva Á, Barbagelata-López C, Mena Á, Piñeiro-Parga P, Llinares-García D, Freire-Castro S. Pulmonary embolism and screening for concomitant proximal deep vein thrombosis in noncritically ill hospitalized patients with coronavirus disease 2019. *Intern Emerg Med* 2020 Jul 29:1-3. doi: 10.1007/s11739-020-02460-7.
13. Fauvel C, Weizman O, Trimaille A, Mika D, Pommier T, Pace N, Douair A, Barbin E, Fraix A, Bouchot O, Benmansour O, Godeau G, Mecheri Y, Lebourdon R, Yvorel C, Massin M, Leblon T, Chabbi C, Cugney E, Benabou L, Aubry M, Chan C, Boufoula I, Barnaud C, Bothorel L, Duceau B, Willy Sutter W, Waldmann V, Bonnet G, Cohen A, Pezel T, Critical Covid-19 France Investigators. Pulmonary embolism in COVID-19 patients: a French multicentre cohort study. *Eur Heart J* 2020 Jul 13; ehaa500. doi: 10.1093/eurheartj/ehaa500.
14. Fraissé M, Logre E, Pajot O, Mentec H, Plantefève G, Contou D. Thrombotic and hemorrhagic events in critically ill COVID-19 patients: a French monocenter retrospective study. *Crit Care* 2020; 24: 275.

15. Grandmaison G, Andrey A, Périard D, Engelberger RP, Carrel G, Doll S, Dexpert JB, Krieger C, Ksouri H, Hayoz D, Sridharan G. Systematic screening for venous thromboembolic events in COVID-19 pneumonia. *TH Open* 2020; 4: e113-e115.
16. Grillet F, Behr J, Calame P, Aubry S, Delabrousse E. Acute pulmonary embolism associated with COVID-19 pneumonia detected by pulmonary CT angiography. *Radiology* 2020 Apr 23: 201544. doi: 10.1148/radiol.2020201544.
17. Hékimian G, Lebreton G, Bréchet N, Luyt CE, Schmidt M, Combes A. Severe pulmonary embolism in COVID-19 patients: a call for increased awareness. *Crit Care* 2020; 24: 274.
18. Helms J, Tacquard C, Severac F, Leonard-Lorant I, Ohana M, Delabranche X, Merdji H, Clere-Jehl R, Schenck M, Fagot Gandet F, Fafi-Kremer S, Castelain V, Schneider F, Grunebaum L, Anglés-Cano E, Sattler L, Mertes PM, Meziani F; CRICS TRIGGERSEP Group (Clinical Research in Intensive Care and Sepsis Trial Group for Global Evaluation and Research in Sepsis). High risk of thrombosis in patients with severe SARS-CoV-2 infection: a multicenter prospective cohort study. *Intensive Care Med* 2020; 46: 1089-1098.
19. Hippensteel JA, Burnham EL, Jolley SE. Prevalence of venous thromboembolism in critically ill patients with COVID-19. *Br J Haematol* 2020; 190: e134-e137.
20. Klok FA, Kruip MJHA, van der Meer NJM, et al. Incidence of thrombotic complications in critically ill ICU patients with COVID-19. *Thromb Res* 2020 (press).
21. Klok FA, Kruip MJHA, van der Meer NJM, Arbous MS, Gommers D, Kant KM, Kaptein FHJ, van Paassen J, Stals MAM, Huisman MV, Endeman H. Confirmation of the high cumulative incidence of thrombotic complications in critically ill ICU patients with COVID-19: An updated analysis. *Thromb Res* 2020; 191: 148-150.
22. Koleilat I, Galen B, Choinski K, Hatch AN, Jones DB, Billett H, Indes J, Lipsitz E. Clinical characteristics of acute lower extremity deep venous thrombosis diagnosed by duplex in patients hospitalized for coronavirus disease 2019. *J Vasc Surg Venous Lymphat Disord* 2020 Jun 25: S2213-333X(20)30348-6. doi: 10.1016/j.jvsv.2020.06.012.
23. Llitjos JF, Leclerc M, Chochois C, Monsallier JM, Ramakers M, Auvray M, Merouani K. High incidence of venous thromboembolic events in anticoagulated severe COVID-19 patients. *J Thromb Haemost* 2020; 18: 1743-1746.
24. Lodigiani C, Iapichino G, Carenzo L, Cecconi M, Ferrazzi P, Sebastian T, Kucher N, Studt JD, Sacco C, Alexia B, Sandri MT, Barco S; Humanitas COVID-19 Task Force. Venous and arterial thromboembolic complications in COVID-19 patients admitted to an academic hospital in Milan, Italy. *Thromb Res* 2020; 191: 9-14.
25. Longchamp A, Longchamp J, Manzocchi-Besson S, Whiting L, Haller C, Jeanneret S, Godio M, Garcia Martinez JJ, Bonjour T, Caillat M, Maitre G, Thaler JM, Pantet R, Donner V, Dumoulin A, Emonet S, Greub G, Friolet R, Robert-Ebadi H, Righini M, Sanchez B, Delaloye J. Venous thromboembolism in critically ill patients with COVID-19: Results of a screening study for deep vein thrombosis. *Res Pract Thromb Haemost* 2020; 4: 842-847.
26. Maatman TK, Jalali F, Feizpour C, Douglas A 2nd, McGuire SP, Kinnaman G, Hartwell JL, Maatman BT, Kreutz RP, Kapoor R, Rahman O, Zyromski NJ, Meagher AD. Routine venous thromboembolism prophylaxis may be inadequate in the hypercoagulable state of severe coronavirus disease 2019. *Crit Care Med* 2020 May 27: 10.1097/CCM.0000000000004466. doi: 10.1097/CCM.0000000000004466.
27. Mazzaccaro D, Giacomazzi F, Giannetta M, Varriale A, Scaramuzza R, Modafferi A, Malacrida G, Righini P, Marrocco-Trischitta MM, Nano G. Non-overt coagulopathy in non-ICU patients with mild to moderate COVID-19 pneumonia. *J Clin Med* 2020; 9: 1781.

28. Mei F, Fan J, Yuan J, Liang Z, Wang K, Sun J, Guan W, Huang M, Li Y, Zhang WW. Comparison of Venous Thromboembolism Risks Between COVID-19 Pneumonia and Community-Acquired Pneumonia Patients. *Arterioscler Thromb Vasc Biol.* 2020 Jul 6: ATVBAHA120314779. doi: 10.1161/ATVBAHA.120.314779.
29. Mestre-Gómez B, Lorente-Ramos RM, Rogado J, Franco-Moreno A, Obispo B, Salazar-Chiriboga D, Saez-Vaquero T, Torres-Macho J, Abad-Motos A, Cortina-Camarero C, Such-Diaz A, Ruiz-Velasco E, Churruca-Sarasqueta J, Muñoz-Rivas N; Infanta Leonor Thrombosis Research Group. Incidence of pulmonary embolism in non-critically ill COVID-19 patients. Predicting factors for a challenging diagnosis. *J Thromb Thrombolysis* 2020 Jun 29:1-7. doi: 10.1007/s11239-020-02190-9.
30. Middeldorp S, Coppens M, van Haaps TF, Foppen M, Vlaar AP, Muller MC, Bouman CC, Beenen LF, Kootte RS, Heijmans J, Smits LP, Bonta PI, van Es N. Incidence of venous thromboembolism in hospitalized patients with COVID-19. *J Thromb Haemost* 2020; 18: 1995-2002.
31. Minuz P, Mansueto G, Mazzaferri F, Fava C, Dalbeni A, Ambrosetti MC, Sibani M, Tacconelli E. High rate of pulmonary thromboembolism in patients with SARS-CoV-2 pneumonia. *Clin Microbiol Infect.* 2020 Jun 18: S1198-743X(20)30352-9. doi: 10.1016/j.cmi.2020.06.011.
32. Moll M, Zon RL, Sylvester KW, Chen EC, Cheng V, Connell NT, Fredenburgh LE, Baron RM, Cho MH, Woolley AE, Connors JM. VTE in ICU patients with COVID-19. *Chest* 2020 Jul 22: S0012-3692(20)31962-0. doi: 10.1016/j.chest.2020.07.031.
33. Nahum J, Morichau-Beauchant T, Daviaud F, Echegut P, Fichet J, Maillet JM, Thierry S. Venous thrombosis among critically ill patients with coronavirus disease 2019 (COVID-19). *JAMA Netw Open* 2020; 3: e2010478.
34. Patell R, Bogue T, Bindal P, Koshy A, Merrill M, Aird WC, Bauer KA, Zwicker JI. Incidence of thrombosis and hemorrhage in hospitalized cancer patients with COVID-19. *J Thromb Haemost* 2020 Jul 21:10.1111/jth.15018. doi: 10.1111/jth.15018.
35. Pesavento R, Ceccato D, Pasquetto G, Monticelli J, Leone L, Frigo A, Gorgi D, Postal A, Marchese GM, Cipriani A, Saller A, Sarais C, Criveller P, Gemelli M, Capone F, Fioretto P, Pagano C, Rossato M, Avogaro A, Simioni P, Prandoni P, Vettor R. The hazard of (sub)therapeutic doses of anticoagulants in non-critically ill patients with Covid-19: the Padua province experience. *J Thromb Haemost* 2020 Jul 21:10.1111/jth.15022. doi: 10.1111/jth.15022.
36. Poissy J, Goutay J, Caplan M, et al; Lille ICU Haemostasis COVID-19 group. Pulmonary embolism in COVID-19 patients: awareness of an increased prevalence. *Circulation* 2020 (press).
37. Ren B, Yan F, Deng Z, Zhang S, Xiao L, Wu M, Cai L. Extremely high incidence of lower extremity deep venous thrombosis in 48 patients with severe COVID-19 in Wuhan. *Circulation* 2020; 142: 181-183.
38. Rieder M, Goller I, Jeserich M, Baldus N, Pollmeier L, Wirth L, Supady A, Bode C, Busch HJ, Schmid B, Duerschmied D, Gauchel N, Lothar A. Rate of venous thromboembolism in a prospective all-comers cohort with COVID-19. *J Thromb Thrombolysis* 2020 Jul 2: 1-9. doi: 10.1007/s11239-020-02202-8.
39. Santoliquido A, Porfidia A, Nesci A, De Matteis G, Marrone G, Porceddu E, Cammà G, Giarretta I, Fantoni M, Landi F, Gasbarrini A, Pola R; GEMELLI AGAINST COVID-19 Group. Incidence of deep vein thrombosis among non-ICU patients hospitalized for COVID-19 despite pharmacological thromboprophylaxis. *J Thromb Haemost* 2020 Jul 6:10.1111/jth.14992. doi: 10.1111/jth.14992.
40. Stoneham SM, Milne KM, Nuttall E, Frew GH, Sturrock BR, Sivaloganathan H, Ladikou EE, Drage S, Phillips B, Chevassut TJ, Eziefula AC. Thrombotic risk in COVID-19: a case series and case-control study. *Clin Med (Lond)* 2020; 20: e76-e81.
41. Tavazzi G, Civardi L, Caneva L, Mongodi S, Mojoli F. Thrombotic events in SARS-CoV-2 patients: an urgent call for ultrasound screening. *Intensive Care Med* 2020; 46: 1121-1123.



42. Thomas W, Varley J, Johnston A, Symington E, Robinson M, Sheares K, Lavinio A, Besser M. Thrombotic complications of patients admitted to intensive care with COVID-19 at a teaching hospital in the United Kingdom. *Thromb Res*. 2020. doi: 10.1016/j.thromres.2020.04.028.
43. Trimaille A, Curtiaud A, Marchandot B, Matsushita K, Sato C, Leonard-Lorant I, Sattler L, Grunebaum L, Ohana M, Von Hunolstein JJ, Andres E, Goichot B, Danion F, Kaeuffer C, Poindron V, Ohlmann P, Jesel L, Morel O. Venous thromboembolism in non-critically ill patients with COVID-19 infection. *Thromb Res* 2020; 193: 166-169.
44. Voicu S, Bonnin P, Stépanian A, Chousterman BG, Le Gall A, Malissin I, Deye N, Siguret V, Mebazaa A, Mégarbane B. High prevalence of deep vein thrombosis in mechanically ventilated COVID-19 patients. *J Am Coll Cardiol* 2020; 76: 480-482.
45. Whyte MB, Kelly PA, Gonzalez E, Arya R, Roberts LN. Pulmonary embolism in hospitalised patients with COVID-19. *Thromb Res* 2020; 195: 95-99.
46. Wright FL, Vogler TO, Moore EE, Moore HB, Wohlauer MV, Urban S, Nydam TL, Moore PK, McIntyre RC Jr. Fibrinolysis shutdown correlation with thromboembolic events in severe COVID-19 infection. *J Am Coll Surg* 2020; 231: 193-203.
47. Xu J, Wang L, Zhao L, Li Q, Gu J, Liang S, Zhao Q, Liu J. Risk assessment of venous thromboembolism and bleeding in COVID-19 patients. 24 Mar 2020, PREPRINT available at Research Square [https:// 10.21203/rs.3.rs-18340/v1](https://10.21203/rs.3.rs-18340/v1).
48. Zerwes S, Hernandez Cancino F, Liebetrau D, Gosslau Y, Warm T, Märkl B, Hyhlik-Dürr A. Increased risk of deep vein thrombosis in intensive care unit patients with CoViD-19 infections? - Preliminary data. *Der Chirurg* 2020; 91: 588-594.
49. Zhang L, Feng X, Zhang D, Jiang C, Mei H, Wang J, Zhang C, Li H, Xia X, Kong S, Liao J, Jia H, Pang X, Song Y, Tian Y, Wang B, Wu C, Yuan H, Zhang Y, Li Y, Sun W, Zhang Y, Zhu S, Wang S, Xie Y, Ge S, Zhang L, Hu Y, Xie M. Deep vein thrombosis in hospitalized patients with COVID-19 in Wuhan, China. Prevalence, risk factors, and outcome. *Circulation* 2020; 142: 114-128.
50. Stroup DF, Berlin JA, Morton SC, et al, for the Meta-analysis Of Observational Studies in Epidemiology (MOOSE) Group. Meta-analysis of observational studies in epidemiology. A proposal for reporting. *JAMA* 2000; 283: 2008-2012.
